# Supplementary material for: P021 再燃を繰り返すアレルギー性気管支肺アスペルギルス症(ABPA)にオマリズマブが有効であった1例(成人気管支喘息,ポスターセッション,第24回日本アレルギー学会春季臨床大会)
Source: Royal Society of Chemistry journal article supplement (doi:10.1039/c3ib40180d), 2012-04-10
Supplement: c3ib40180d.xlsx [file c3ib40180d.xlsx]

## Sheet: Sheet1
transcription factors (TFs)	potential target genes		lIterature confirmed interactions:	TFs	target genes matched with literature information	regulatory direction
AguR	PA0502			ArgR	PA5170	postive
AguR	PA1245			ArgR	PA5171	postive
AguR	PA2796			ArgR	PA5172	postive
AguR	PA3530			ArgR	PA5173	postive
AguR	PA3898			LasR	PA1245	postive
AguR	PA3930			LasR	PA1249	postive
AguR	PA4090			LasR	PA1250	postive
AguR	PA5170			LasR	PA2250	postive
AguR	PA5171			LasR	PA2588	postive
AguR	PA5172			LasR	PA2591	postive
AguR	PA5173			LasR	PA3326	postive
AlgR	PA0291			LasR	PA3476	postive
AlgR	PA1245			Anr	PA1561	postive
AlgR	PA2204			Anr	PA1746	postive
AlgR	PA2643			Anr	PA3930	unknown
AlgR	PA3145			Anr	PA5170	postive
AlgR	PA3326			Anr	PA5171	postive
AlgR	PA3478			Anr	PA5172	postive
AlgR	PA3698			Anr	PA5173	postive
AlgR	PA3930			PvdS	PA2400	postive
AlgU	PA0315			PvdS	PA2402	postive
AlgU	PA1357			RhlR	PA1245	postive
AlgU	PA1986			RhlR	PA2591	postive
AlgU	PA1988			RhlR	PA3326	postive
AlgU	PA2204			RhlR	PA3476	postive
AlgU	PA3530			RhlR	PA3478	postive
AlgU	PA4515			Fur	PA3530	negative
AlgZ	PA1550			Fur	PA4515	negative
AlgZ	PA2591			OxyR	PA1249	unknown
AlgZ	PA5255			MexT	PA3530	postive
Anr	PA1561			GlpR	PA3581	unknown
Anr	PA1746			IHF	PA0291	postive
Anr	PA3930			RpoS	PA0399	postive
Anr	PA5028			RpoS	PA2204	negative
Anr	PA5170
Anr	PA5171
Anr	PA5172
Anr	PA5173
ArgR	PA0547
ArgR	PA1035
ArgR	PA2588
ArgR	PA2591
ArgR	PA2840
ArgR	PA3147
ArgR	PA5170
ArgR	PA5171
ArgR	PA5172
ArgR	PA5173
CysB	PA0291
CysB	PA0399
CysB	PA0400
CysB	PA1035
CysB	PA1249
CysB	PA1522
CysB	PA2840
CysB	PA3369
CysB	PA3930
CysB	PA4515
CysB	PA5170
CysB	PA5171
CysB	PA5172
CysB	PA5173
ExsA	PA0502
ExsA	PA0547
ExsA	PA1245
ExsA	PA1249
ExsA	PA1522
ExsA	PA1864
ExsA	PA2250
ExsA	PA2840
ExsA	PA3104
ExsA	PA3145
ExsA	PA3146
ExsA	PA3147
ExsA	PA3149
ExsA	PA3150
ExsA	PA3369
ExsA	PA3930
ExsA	PA5170
ExsA	PA5171
ExsA	PA5172
ExsA	PA5173
ExsA	PA5243
FleQ	PA0291
FleQ	PA1550
FleQ	PA2299
FleQ	PA2840
FleQ	PA4130
FleQ	PA5243
Fur	PA0291
Fur	PA0502
Fur	PA1245
Fur	PA1249
Fur	PA1864
Fur	PA2747
Fur	PA2796
Fur	PA2840
Fur	PA3326
Fur	PA3369
Fur	PA3530
Fur	PA4068
Fur	PA4090
Fur	PA4515
Fur	PA5028
Fur	PA5170
Fur	PA5171
Fur	PA5172
Fur	PA5173
Fur	PA5313
Fur	PA5531
GlpR	PA0547
GlpR	PA1245
GlpR	PA1249
GlpR	PA2204
GlpR	PA2250
GlpR	PA2560
GlpR	PA2591
GlpR	PA2747
GlpR	PA2796
GlpR	PA2840
GlpR	PA3326
GlpR	PA3369
GlpR	PA3478
GlpR	PA3581
GlpR	PA4090
IHF	PA0291
IHF	PA0502
IHF	PA0547
IHF	PA1035
IHF	PA1245
IHF	PA1249
IHF	PA1522
IHF	PA1561
IHF	PA1996
IHF	PA1999
IHF	PA2204
IHF	PA2250
IHF	PA2299
IHF	PA2380
IHF	PA2423
IHF	PA2747
IHF	PA2796
IHF	PA3145
IHF	PA3146
IHF	PA3147
IHF	PA3149
IHF	PA3150
IHF	PA3326
IHF	PA3369
IHF	PA3478
IHF	PA3581
IHF	PA3930
IHF	PA4090
IHF	PA4515
IHF	PA4655
IHF	PA5028
IHF	PA5170
IHF	PA5171
IHF	PA5172
IHF	PA5173
IHF	PA5255
IHF	PA5313
LasR	PA0315
LasR	PA0547
LasR	PA1245
LasR	PA1249
LasR	PA1250
LasR	PA1986
LasR	PA1988
LasR	PA1996
LasR	PA2250
LasR	PA2588
LasR	PA2591
LasR	PA3326
LasR	PA3476
LasR	PA3478
LasR	PA3581
LasR	PA4515
LasR	PA5148
MexR	PA0502
MexR	PA1996
MexR	PA1999
MexR	PA4655
MexR	PA5255
MexT	PA0502
MexT	PA1249
MexT	PA2204
MexT	PA2643
MexT	PA3530
MexT	PA4372
MexT	PA5170
MexT	PA5171
MexT	PA5172
MexT	PA5173
MexT	PA5531
MvaT	PA0291
MvaT	PA0502
MvaT	PA1245
MvaT	PA1746
MvaT	PA2400
MvaT	PA2402
MvaT	PA2616
MvaT	PA2747
MvaT	PA2796
MvaT	PA3326
MvaT	PA3530
MvaT	PA3581
MvaT	PA3930
MvaT	PA4515
MvaT	PA4655
MvaT	PA5170
MvaT	PA5171
MvaT	PA5172
MvaT	PA5173
MvfR	PA1249
MvfR	PA2588
MvfR	PA3930
NarL	PA5028
NfxB	PA1245
NfxB	PA1249
NfxB	PA1522
NfxB	PA1561
NfxB	PA2204
NfxB	PA2747
NfxB	PA2796
NfxB	PA2840
NfxB	PA3369
NfxB	PA3581
NfxB	PA3930
NfxB	PA4515
NfxB	PA5028
NfxB	PA5170
NfxB	PA5171
NfxB	PA5172
NfxB	PA5173
OxyR	PA0502
OxyR	PA1245
OxyR	PA1249
OxyR	PA2747
OxyR	PA2840
OxyR	PA3581
OxyR	PA4372
OxyR	PA5028
PhoB	PA0547
PhoB	PA1245
PhoB	PA1561
PhoB	PA2400
PhoB	PA2402
PhoB	PA3478
PhoB	PA3530
PhoB	PA4090
PilR	PA0291
PilR	PA1245
PilR	PA2840
PilR	PA3478
PilR	PA4515
PilR	PA5243
PrtN	PA0363
PrtN	PA1249
PrtN	PA1963
PrtN	PA2747
PrtN	PA4515
PsrA	PA1245
PsrA	PA1493
PsrA	PA1522
PsrA	PA2380
PsrA	PA2400
PsrA	PA2402
PsrA	PA2643
PsrA	PA5255
PtxS	PA0502
PtxS	PA1035
PtxS	PA1245
PtxS	PA1249
PvdS	PA0291
PvdS	PA0502
PvdS	PA1493
PvdS	PA2400
PvdS	PA2402
PvdS	PA3145
PvdS	PA3146
PvdS	PA3147
PvdS	PA3149
PvdS	PA3150
PvdS	PA3326
PycR	PA0337
PycR	PA2840
PycR	PA3224
PycR	PA3476
QscR	PA1245
QscR	PA1287
QscR	PA1522
QscR	PA1986
QscR	PA1988
QscR	PA3476
QscR	PA3930
RhlR	PA1245
RhlR	PA2591
RhlR	PA3326
RhlR	PA3476
RhlR	PA3478
RhlR	PA5148
RpoH	PA0337
RpoH	PA0502
RpoH	PA2588
RpoH	PA3930
RpoH	PA4372
RpoH	PA5170
RpoH	PA5171
RpoH	PA5172
RpoH	PA5173
RpoN	PA0291
RpoN	PA0315
RpoN	PA1986
RpoN	PA2204
RpoN	PA2560
RpoN	PA3369
RpoN	PA4655
RpoN	PA5170
RpoN	PA5171
RpoN	PA5172
RpoN	PA5173
RpoS	PA0399
RpoS	PA0400
RpoS	PA1493
RpoS	PA1550
RpoS	PA2030
RpoS	PA2204
RsaL	PA0291
RsaL	PA1249
RsaL	PA1493
RsaL	PA2591
RsaL	PA5243
SigX	PA0502
SigX	PA2380
SigX	PA2591
SigX	PA3145
SigX	PA5170
SigX	PA5171
SigX	PA5172
SigX	PA5173
Vfr	PA0502
Vfr	PA1561
Vfr	PA2400
Vfr	PA2402
Vfr	PA2796
