# Supplementary material for: Essential O2-responsive genes of Pseudomonas aeruginosa and their network revealed by integrating dynamic data from inverted conditions
Source: Royal Society of Chemistry journal article supplement (doi:10.1039/c3ib40180d), 2013-11-26
Supplement: c3ib40180d_2.pdf [file c3ib40180d_2.pdf]

**Supplementary Table S3. List of selected 39 Transcription Factors, their experimentally verified binding sites used for the construction of the corresponding PSSMs and the literary sources and references.**

| No                                | TF (PA id)            | Binding Site Sequence                              | Binding Region                | References                                                                               |
|-----------------------------------|-----------------------|----------------------------------------------------|-------------------------------|------------------------------------------------------------------------------------------|
| 1                                 | ExsA<br><b>PA1713</b> | TGCCGATTCCAGTGAAAAAACGGCGGCCAATC<br>CTGATAGGC      | exoS<br>operon(a)             | (Hovey&Frank 1995),<br>(Yahr et al. 1995),(Yahr et al. 1996) ,<br>(Goranson et al. 1997) |
|                                   |                       | AATGCCGGGCTAAAAATAACTGACGTTTTTTGA<br>AAGCCCGGTAGCG | exsD-pscBL<br>operon(a)       |                                                                                          |
|                                   |                       | TGTGGCTTTTTTCTTAAAAGAAAAGTCTCTCAG<br>TGACAAAAGC    | exsCBA<br>operon(a)           |                                                                                          |
|                                   |                       | GCGGCAAACCTAAAAAAGAGAACCACGATT<br>AACAGTCTCTC      | orf1<br>operon(a)             |                                                                                          |
| 2                                 | MexR<br><b>PA0424</b> | AAATGTGGTTGATCCAGTCAACTATTTTTG                     | mexAB-<br>oprM<br>operon (re) | (Evans et al. 2001)                                                                      |
|                                   |                       | ATTTAGTTGACCTTATCAACCTTGTTT                        | mexAB-<br>oprM<br>operon (re) |                                                                                          |
| 3                                 | Dnr<br><b>PA0527</b>  | TTGACGGCCGTCAA                                     | hemF<br>operon(a)             | (Rompf et al. 1998),(Arai et al. 2003)                                                   |
|                                   |                       | TTGATACAAATCAA                                     | hemN<br>operon(a)             |                                                                                          |
|                                   |                       | TTGACTTTCATCAA                                     | nosRZDFY<br>L operon(a)       |                                                                                          |
| 4                                 | AlgU<br><b>PA0762</b> | CGGAACTTTCCTCCGCGCCGTGGCTCTGAACAG<br>CC            | new site(a)                   | (Firoved et al. 2002)                                                                    |
|                                   |                       | AAGAACTTTGAGGGCAAGTCGAAGTTCAAAC<br>GTGG            | oprF<br>operon(a)             |                                                                                          |
|                                   |                       | TGGAACTTCACGCCAGCGCAAATGTTCAAAGG<br>GCT            | lptA<br>operon(a)             |                                                                                          |
|                                   |                       | CTGAACTTGTCCGGGTGCGTCGTCTCCCATGT<br>AGA            | osmC<br>operon(a)             |                                                                                          |
|                                   |                       | AGGAACTTGAGATCGTGCAGGGTGTCCAATA<br>TTTC            | PA3952<br>operon(a)           |                                                                                          |
|                                   |                       | GCGAACTTGTGCGAGTCGTGCCGTTCCAAGCA<br>GCC            | PA3902<br>operon(a)           |                                                                                          |
|                                   |                       | TGGAACTTGGTGGTTTTTGCCAGTCCTAGGCA<br>AGG            | ycfJ<br>operon(a)             |                                                                                          |
|                                   |                       | TGGAACTTTCCTTGCGGCCTTGCATCGCATA<br>TCAAG           | betT2<br>operon(a)            |                                                                                          |
|                                   |                       | CCGAACTTTCGAGGAAAAACCGATTCTAACC<br>AAGCCA          | dksA<br>operon(a)             |                                                                                          |
|                                   |                       | GTGAACTTTCACACAAAACGCATATCTGAATCC<br>ATTTG         | phuR<br>operon(a)             |                                                                                          |
|                                   |                       | TGGAACTTCTGGCGGGGCGATAGCTCCCATG<br>AGCCGC          | tal operon(a)                 |                                                                                          |
|                                   |                       | GAGAACTTTTGCAAGAAGCCGAGTCTATCTTG<br>GCA            | algU<br>operon(a)             |                                                                                          |
|                                   |                       | GGGCACTTTTCGGGCTAAAGCGAGTCTCAGC<br>GTCG            | algR<br>operon(a)             |                                                                                          |
|                                   |                       | TCGAACTTAGGCGCAGAATGTCGGGTCCCACG<br>GACA           | PA0856<br>operon(a)           |                                                                                          |
|                                   |                       | TTGAACTTATCCGCGCGCACCTGTTCTATTGC<br>CCA            | PA3262<br>operon(a)           |                                                                                          |
| AGGAACTTATACACCCGCTTGCAGTCAGATATC | rpoH                  |                                                    |                               |                                                                                          |

|                                                |                          |                                                  |                                |                                                                                                                                                                                                                                        |
|------------------------------------------------|--------------------------|--------------------------------------------------|--------------------------------|----------------------------------------------------------------------------------------------------------------------------------------------------------------------------------------------------------------------------------------|
|                                                |                          | CGA                                              | operon(a)                      |                                                                                                                                                                                                                                        |
|                                                |                          | CGGAACTTCCCTCGCAGAGAAAACATCCTATC<br>ACCG         | algD- <i>algA</i><br>operon(a) |                                                                                                                                                                                                                                        |
|                                                |                          | TGGAACCTTTCTTAGACGCATCGGTTCCAAAGCA<br>GGA        | <i>algU</i><br>operon(a)       |                                                                                                                                                                                                                                        |
| 5                                              | PhoB<br>PA5360           | CTGTCATTCATCCTTAAC                               | <i>katA</i> gene(a)            | ( <a href="#">Yuan et al. 2005</a> )                                                                                                                                                                                                   |
| 6                                              | ArgR<br>PA0893           | CGGGTTGGCGCTATAACAAGTTGTGCGCATGGC<br>GGCAATGCCG  | <i>aruC</i><br>operon(a)       | ( <a href="#">Park et al. 1997</a> ),<br>( <a href="#">Ochs et al. 1999</a> ), ( <a href="#">Lu et al. 1999</a> ), ( <a href="#">Lu et al. 1998</a> ),<br>( <a href="#">Lu&amp;Abdela l 2001</a> ), ( <a href="#">Lu et al. 2004</a> ) |
|                                                |                          | CGTCGCTTATTGGTGGACCGGAATGTCGCGAT<br>TCTGTAAACTAC | <i>carA</i><br>operon(re)      |                                                                                                                                                                                                                                        |
|                                                |                          | CTGCGCCTTCCCGATGCTTTCTGTCGCATTTC<br>GAAAGCCGC    | <i>aruC</i><br>operon(a)       |                                                                                                                                                                                                                                        |
|                                                |                          | CCTCCTTGTGTTTCCGCGACATTTCTTATAAG<br>ATCGCGCCT    | <i>argF</i><br>operon(re)      |                                                                                                                                                                                                                                        |
|                                                |                          | CTTCGGTGCTTTTATAATTAGTTGTGCGATTGA<br>AGAAATAACC  | <i>aot + argR</i><br>operon(a) |                                                                                                                                                                                                                                        |
|                                                |                          | CGCACCTACGCAGATGCGACATGCGTCATGCA<br>ATTTTGCAGACA | <i>oprD</i><br>operon(a)       |                                                                                                                                                                                                                                        |
|                                                |                          | GCGACTTACAGGAATGCGTCATCTAATTACTTT<br>GAGTAGGAA   | <i>arcDABC</i><br>operon(a)    |                                                                                                                                                                                                                                        |
|                                                |                          | TGCTCCCGGGGTGAACGAATATGTCGCAGCAC<br>GGTAAGTGTTT  | <i>gdhB</i><br>operon(a)       |                                                                                                                                                                                                                                        |
|                                                |                          | TGTCGCTTTTGCCTTAAAGCTGTCGCCCTCT<br>GTAATTTCC     | <i>argG</i><br>operon(re)      |                                                                                                                                                                                                                                        |
|                                                |                          | GCCAGTTACAACGTAGCGACACCTCAGGTCGC<br>CCAGGCGTCA   | PA0328<br>operon(a)            |                                                                                                                                                                                                                                        |
|                                                |                          | GAAAGTTTCAGTTTTGCACCATAAAGATTCATC<br>AATGCGTCA   | <i>gdhA</i><br>operon(re)      |                                                                                                                                                                                                                                        |
|                                                |                          | CCGACTTGTGTTGCCGCGACCTTTCTTACAAG<br>GGCAAGCCG    | <i>adcAB</i><br>operon(a)      |                                                                                                                                                                                                                                        |
|                                                |                          | CGGCACCGCGAGGCCGCGCCAGCCCTTCCCT<br>AGATGGGAGA    | <i>speA</i><br>operon(u)       |                                                                                                                                                                                                                                        |
|                                                |                          | CGGACTGTTCTGATTGCGACGTCGTTTTTCAAC<br>AAAAGGACA   | <i>braZ</i><br>operon(a)       |                                                                                                                                                                                                                                        |
|                                                |                          | GGTCGCCTCTGCGACATTCGCTGTCGTGTCGCG<br>GCGTGCCGC   | PA3934<br>operon(a)            |                                                                                                                                                                                                                                        |
|                                                |                          | CAGTTTTGTTCTACGCGACAGCGCACTGCAGC<br>GATGCGACA    | PA5152-<br>PA5153<br>operon(a) |                                                                                                                                                                                                                                        |
| GGGATTTCCGGCCTCCCGGCTGGCAATGCGCCT<br>GCGACGACA | <i>ygiU</i><br>operon(a) |                                                  |                                |                                                                                                                                                                                                                                        |
| 7                                              | FleQ<br>PA1097           | TGTCGGATGATTGACAG                                | <i>FleSR</i><br>operon(a)      | (Arora et al. 1997), (Jyot et al. 2002)                                                                                                                                                                                                |
|                                                |                          | TGTCGCTCTGCCGCCA                                 | <i>FleSR</i><br>operon(a)      |                                                                                                                                                                                                                                        |
|                                                |                          | CCGGCGTCAAAGTTTGTT                               | <i>flhA</i><br>operon(a)       |                                                                                                                                                                                                                                        |
|                                                |                          | AAAAGCCGCGGCTGTT                                 | <i>fliE</i><br>operon(a)       |                                                                                                                                                                                                                                        |
|                                                |                          | AAACCCTTCATTGACGCTATAGCGACGGATTT<br>TTGGCATGG    | <i>fliL</i><br>operon(a)       |                                                                                                                                                                                                                                        |
| 8                                              | LasR<br>PA1430           | ACCCACCTACCAGAATTGGCAGGGG                        | <i>hcnABC</i><br>operon(a)     |                                                                                                                                                                                                                                        |
|                                                |                          | ACCGCGGTTTCCACCAGGG                              | <i>hcnABC</i><br>operon(a)     |                                                                                                                                                                                                                                        |
|                                                |                          | ACCTGCCAGTTCTGGCAGGT                             | <i>lasB</i><br>operon(a)       |                                                                                                                                                                                                                                        |
|                                                |                          | CACTGCCAGATCTGGCAGTT                             | <i>AcpP-like</i>               |                                                                                                                                                                                                                                        |

|    |                       |                                                |                                            |                                                                                                                                                              |                                                                                                                                                                         |
|----|-----------------------|------------------------------------------------|--------------------------------------------|--------------------------------------------------------------------------------------------------------------------------------------------------------------|-------------------------------------------------------------------------------------------------------------------------------------------------------------------------|
|    |                       |                                                | operon(a)                                  |                                                                                                                                                              |                                                                                                                                                                         |
|    |                       | ACCTACCAGATCTTGTAGTT                           | phzA1<br>operon(a)                         |                                                                                                                                                              |                                                                                                                                                                         |
|    |                       | ATCTATCTCATTGCTAGTT                            | lasI<br>operon(a)                          | (Pessi&Haas 2000),(Whit eley&Green berg 2001), (Schuster et al, 2004),(Rust et al, 1996),(Whit eley et al, 1999),(de Kievit et al, 2002),(Pesci et al, 1997) |                                                                                                                                                                         |
|    |                       | ATCTATCTCATTGCTAGTT                            | RsaL<br>operon(a)                          |                                                                                                                                                              |                                                                                                                                                                         |
|    |                       | CCCTACCAGATCTGGCAGGT                           | rhIL<br>operon(a)                          |                                                                                                                                                              |                                                                                                                                                                         |
|    |                       | TTTTGCCGTATCGGCAAGGC                           | rhIR<br>operon(a)                          |                                                                                                                                                              |                                                                                                                                                                         |
|    |                       | ACCTGCTTTTCTGCTAGCTA                           | lasB<br>operon(a)                          |                                                                                                                                                              |                                                                                                                                                                         |
|    |                       | AAAACAACCAGAACAGATAGTTTTTCC                    | PA0572<br>operon(u)                        |                                                                                                                                                              |                                                                                                                                                                         |
|    |                       | CCTCCTGAGCAGTTCAGATAGGTTGT                     | PA3904<br>operon(u)                        |                                                                                                                                                              |                                                                                                                                                                         |
|    |                       | GCCGGCAACTAGCTATCACTTGGAGTAGCTGG<br>CTGGCCTTCT | PA4677<br>operon(u)                        |                                                                                                                                                              |                                                                                                                                                                         |
| 9  | Anr<br><b>PA1544</b>  | TTGACGTGGATCAG                                 | arcDABC<br>operon(a)                       |                                                                                                                                                              | (Rompf et al, 1998), (Pessi&Haas 2000), (Galimand et al, 1991),(Gamber et al, 1991),(Winteler&Haas 1996),(Vijgenboom et al, 1997),(Arai et al, 1995),(Arai et al, 1997) |
|    |                       | TTGACCTGAATCAG                                 | azurin<br>operon(a)                        |                                                                                                                                                              |                                                                                                                                                                         |
|    |                       | CTGTCATGGATCAA                                 | hcnABC<br>operon(a)                        |                                                                                                                                                              |                                                                                                                                                                         |
|    |                       | TTGATACAAATCAA                                 | hemN<br>operon(a)                          |                                                                                                                                                              |                                                                                                                                                                         |
|    |                       | TTGACGGCCGTCAA                                 | hemF<br>operon(a)                          |                                                                                                                                                              |                                                                                                                                                                         |
|    |                       | TTGATCGCGGTCAA                                 | PA0526<br>operon(u)                        |                                                                                                                                                              |                                                                                                                                                                         |
|    |                       | TTGCCGTGCGTCAA                                 | dnr<br>operon(a)                           |                                                                                                                                                              |                                                                                                                                                                         |
|    |                       | TTGACCGGAATCAA                                 | nirSMCFDL<br>GHJEN/Nir<br>QOP<br>operon(a) |                                                                                                                                                              |                                                                                                                                                                         |
|    |                       | TTGATTCCTATCAA                                 | narK1<br>operon(u)                         |                                                                                                                                                              |                                                                                                                                                                         |
|    |                       | TTGTCTCGCGACAA                                 | cioAB<br>operon(u)                         |                                                                                                                                                              |                                                                                                                                                                         |
|    |                       | TTGCTCTGCATCAA                                 | cioAB<br>operon(u)                         |                                                                                                                                                              |                                                                                                                                                                         |
| 10 | PvdS<br><b>PA2426</b> | GCTAATTTT                                      | PA2411-<br>PA2412<br>operon(a)             |                                                                                                                                                              |                                                                                                                                                                         |
|    |                       | AGTAAATCC                                      | PA2413<br>operon(a)                        |                                                                                                                                                              |                                                                                                                                                                         |
|    |                       | GGTAAATTC                                      | PA2427<br>operon(a)                        |                                                                                                                                                              |                                                                                                                                                                         |
|    |                       | GGCAAATTT                                      | PA2451-<br>PA2452<br>operon(a)             |                                                                                                                                                              |                                                                                                                                                                         |
|    |                       | GCTAATTTT                                      | PA2393-<br>PA2395<br>operon(a)             |                                                                                                                                                              |                                                                                                                                                                         |

|    |                |                      |                         |                                                                                               |
|----|----------------|----------------------|-------------------------|-----------------------------------------------------------------------------------------------|
|    |                | GGTAAAACG            | fpvA operon(a)          | (Ochsner et al, 2002), (Wilson et al, 2001), (Hunt et al, 2002)                               |
|    |                | GCTAATTAT            | PA2424-PA2425 operon(a) |                                                                                               |
|    |                | GTTAATTTT            | PA2400-PA2402 operon(a) |                                                                                               |
|    |                | CGTAAATTG            | pvdF operon(a)          |                                                                                               |
|    |                | GTAAATTT             | PA2389-PA2391 operon(a) |                                                                                               |
|    |                | GGTAAATTT            | PA2392 operon(a)        |                                                                                               |
|    |                | CATAAACGG            | PA2531 operon(a)        |                                                                                               |
|    |                | GCGAAGAT             | PA5150 operon(a)        |                                                                                               |
|    |                | CTTAAACCG            | PA1134(a)               |                                                                                               |
|    |                | TATAAAAAA            | PA4175 operon(a)        |                                                                                               |
|    |                | CGTGAATCG            | PA0346 operon(a)        |                                                                                               |
|    |                | CTTGAATGG            | PA0818 operon(a)        |                                                                                               |
|    |                | ATTAAAACC            | PA4833 operon(a)        |                                                                                               |
|    |                | GGTAAATAT            | mvfR operon(a)          |                                                                                               |
|    |                | CATAAATCC            | toxA operon(a)          |                                                                                               |
|    |                | CTTAAATTT            | pvdA operon(a)          |                                                                                               |
|    |                | GCTAAATCC            | pvdD operon(a)          |                                                                                               |
|    |                | GATAAATGA            | ptxR(a)                 |                                                                                               |
|    |                | GCTAGATAC            | toxR operon(a)          |                                                                                               |
|    |                | GCTAAATAC            | pvdE operon(a)          |                                                                                               |
| 11 | RhlR<br>PA3477 | TCCTGTGAAATCTGGCAGTT | rhlAB operon(a)         | (Whiteley & Greenberg 2001), (Whiteley et al. 1999), (Winzer et al, 2000), (Yang et al, 2000) |
|    |                | ACCTACCAGATCTTGTAGTT | phzA1 operon(a)         |                                                                                               |
|    |                | CACTGCCAGATCTGGCAGTT | AcpP-like operon(a)     |                                                                                               |
|    |                | TCCTGCATGAATTGGTAGGC | paIL operon(a)          |                                                                                               |
|    |                | CTGTGTTTCCGACAGC     | migA operon(a)          |                                                                                               |
|    |                | CTCCAGCGACCGTAGC     | migA operon(a)          |                                                                                               |
| 12 | Fur<br>PA4764  | GAAGATGGTAATTAATTGC  | tolQRAB operon(re)      |                                                                                               |
|    |                | ACGAACGTGAATCATTCTC  | pfeR(re)                |                                                                                               |
|    |                | AATAATCAATCTCATTATC  | fagA-sodA operon(re)    |                                                                                               |
|    |                | GAAAACAATAATCAATCTC  | fagA-sodA               |                                                                                               |

|  |  |                      |                          |                                                                                                                                         |
|--|--|----------------------|--------------------------|-----------------------------------------------------------------------------------------------------------------------------------------|
|  |  |                      | operon(re)               |                                                                                                                                         |
|  |  | CTGAATGATAATAATTATC  | tonB<br>operon(re)       |                                                                                                                                         |
|  |  | GATAATAATTATCAGAAGA  | tonB<br>operon(re)       |                                                                                                                                         |
|  |  | CAAACGCATATCTGAATC   | phuR<br>operon(re)       |                                                                                                                                         |
|  |  | GAGATTTATTATCATTGGC  | pchR<br>operon(re)       |                                                                                                                                         |
|  |  | GTAATTGACAATCATTATC  | pvdS<br>operon(re)       |                                                                                                                                         |
|  |  | CAAACGCATATCTGAATC   | phuR<br>operon(re)       | (Ochsner et al. 2002),<br>(Ochsner&Vasil 1996),(Ochsner et al. 1995),(Miyazaki et al. 1995),(Hassett et al. 1997),(Ochsner et al. 2000) |
|  |  | GATTCAGATATGCGTTTTG  | phuS<br>operon(re)       |                                                                                                                                         |
|  |  | GATAATAAGAATTATTCTC  | PA4570<br>operon(a)      |                                                                                                                                         |
|  |  | CATCATGATGGTAATCAGC  | feoAB<br>operon(a)       |                                                                                                                                         |
|  |  | AAAAATGCAAATCTTTTCGC | PA4370<br>operon(a)      |                                                                                                                                         |
|  |  | GATAATAGTTTTTCATTTC  | PA4895-4896<br>operon(a) |                                                                                                                                         |
|  |  | TAAAATGATAACTATTATC  | PA3899-3900<br>operon(a) |                                                                                                                                         |
|  |  | GAGATTTCTTATCATTTCGT | PA5217<br>operon(a)      |                                                                                                                                         |
|  |  | GACAATGCGATTCATTATC  | PA2467-2468<br>operon(a) |                                                                                                                                         |
|  |  | TCCAATGCAAATCAATATC  | piuC<br>operon(a)        |                                                                                                                                         |
|  |  | GAAAATCATTATCATAAAA  | pig25<br>operon(a)       |                                                                                                                                         |
|  |  | GATATGTATTATCATTTCGC | PA1300-1301<br>operon(a) |                                                                                                                                         |
|  |  | GCGAATAATTCTCGTTTTT  | fiuR(pig17)<br>operon(a) |                                                                                                                                         |
|  |  | GAGACTGATTCTTATTACA  | hasRA<br>operon(a)       |                                                                                                                                         |
|  |  | GCAAATGCTAATCATTTCGC | PA2033-2034<br>operon(a) |                                                                                                                                         |
|  |  | CATAATGATAAGCATTATC  | fptA<br>operon(a)        |                                                                                                                                         |
|  |  | GACAATCATTCTCATTATT  | bfd<br>operon(a)         |                                                                                                                                         |
|  |  | GACATTGAGATTCAATAAC  | hemO<br>operon(a)        |                                                                                                                                         |
|  |  | GATGAAGATCGCCATTATC  | PA2385<br>operon(a)      |                                                                                                                                         |
|  |  | ACGATTGCTAATCAATCTT  | pirR<br>operon(a)        |                                                                                                                                         |
|  |  | CTTGATGAGAATTATTATA  | pig32<br>operon(a)       |                                                                                                                                         |
|  |  | TAAATTTATAATAATTCTC  | PA2388<br>operon(a)      |                                                                                                                                         |

|    |                       |                                                         |                                       |                                                                                         |
|----|-----------------------|---------------------------------------------------------|---------------------------------------|-----------------------------------------------------------------------------------------|
|    |                       | GGAATGAGATTTATTATC                                      | pchR operon(re)                       |                                                                                         |
| 13 | Vfr<br><b>PA0652</b>  | AAATGTGATCTAGATCACATTT                                  | lasR operon(a)                        | (Albus et al. 1997),(Hudson&Fried 1990),(Suh et al. 2002),(Dasgupta et al. 2002)        |
|    |                       | AATGTGAGTTAGCTCACTCAT                                   | lacZYA operon(r)                      |                                                                                         |
|    |                       | AAATTGACTAATCGTTCACATTTG                                | fleQ operon(u)                        |                                                                                         |
| 14 | OxyR<br><b>PA5344</b> | ATTGATATTCCTAATCGGCGGGTGAGGTTTTT<br>CAAT                | katB operon (a)                       | (Ochsner et al. 2000)                                                                   |
|    |                       | ATAGATTTAGATAATTTCACTGATGGCCTAAAT<br>CAAT               | ahpC operon(a)                        |                                                                                         |
| 15 | PsrA<br><b>PA3006</b> | CAAACGCCTGTTTG                                          | PA0506 operon(re)                     | (Kojic et al. 2005)                                                                     |
|    |                       | CAAACGTTTGTTTG                                          | etfBA operon and PA2953 operon (re)   |                                                                                         |
|    |                       | GAAACGTATGTTTC                                          | psrA operon(re)                       |                                                                                         |
|    |                       | CAAACAAGTGTTTG                                          | psrA operon(re)                       |                                                                                         |
|    |                       | GAAACCGGGTTTC                                           | mmsR operon(u)                        |                                                                                         |
|    |                       | CAAACGGAAGTTTG                                          | rpoS operon(a)                        |                                                                                         |
| 16 | AlgZ<br><b>PA5262</b> | GTAATCCATTGGCCATTACCAGCCTCCCGCCAT<br>TAC                | algD-algA operon(a)                   | (Wozniak& Ohman 1994),(Baynham&Wozniak 1996),(Baynham et al. 1999),(Ramsey et al. 2005) |
|    |                       | GAAGCCATCATCCAACC                                       | algZ operon(re)                       |                                                                                         |
|    |                       | CAGATAGCTGGTACTGGCAAACGCCGGCACG<br>CAACGCA              | algZ operon(re)                       |                                                                                         |
| 17 | PtxS<br><b>PA2259</b> | TGAAACCGGTTTCA                                          | PtxS operon(re)                       | (Swanson et al. 1999)                                                                   |
| 18 | MvfR<br><b>PA1003</b> | CAGAGCGTCGACTTCCTGCCCGGCGAACTGCA<br>CCTGGGGAGCATGCGCCGG | phnAB operon(a)                       | (Cao et al. 2001)                                                                       |
| 19 | CysB<br><b>PA1754</b> | TGTTGAAATTAAGGCCTTTAGAAACTGAATT<br>CTATGGACCGAAC        | algD-algA operon(a)                   | (Delic-Attree et al. 1997)                                                              |
| 20 | MexT<br><b>PA2492</b> | GTATCACTGTTTCGTGATAATCAAATCTCGTTCG<br>TTCGATTAGT        | mexEF-oprN multidrug efflux operon(a) | (Kohler et al. 1999)                                                                    |
| 21 | PilR<br><b>PA4547</b> | TCCAGCTGTCAAAAAATGTCACATCCTGTCCGT<br>TTTAAGTT           | pilin operon(a)                       | (Jin et al. 1994)                                                                       |

|    |                       |                            |                                 |                                                                                                            |
|----|-----------------------|----------------------------|---------------------------------|------------------------------------------------------------------------------------------------------------|
| 22 | RsaI<br><b>PA1431</b> | TATGAAATTTGCATA            | lasI<br>promoter(re)            | (Cao et al.<br>2001),<br>(Rampioni<br>et al. 2006)                                                         |
|    |                       | TATGCAATCCACATC            | phzA1<br>promoter(u)            |                                                                                                            |
|    |                       | TAGCAATCCCGCATA            | phzM<br>promoter(u)             |                                                                                                            |
|    |                       | TACCCACCTGTCATG            | phzA<br>promoter(u)             |                                                                                                            |
| 23 | RpoN<br><b>PA4462</b> | GGGCCCACGCGTTCCA           | oprE<br>operon(a)               | (Arora et al.<br>1997), (Jyot<br>et al. 2002),<br>(Wozniak &<br>Ohman<br>1994),<br>(Yamano et<br>al. 1998) |
|    |                       | GGCACGGGTATTGC             | FleSR<br>operon(a)              |                                                                                                            |
|    |                       | GGAACTTCCCTCGC             | algD - algA<br>operon(a)        |                                                                                                            |
|    |                       | TGGAACGGTTCCTGC            | flhA<br>operon(a)               |                                                                                                            |
|    |                       | TGGCACCTTGTTGC             | fliE<br>operon(a)               |                                                                                                            |
|    |                       | TGGCACAACCCTTGC            | fliL<br>operon(a)               |                                                                                                            |
| 24 | GlpR<br><b>PA3583</b> | TTTTTTCGAAACTGAACAAT       | glpFK<br>operon(u)              | (Schweizer<br>et al. 1997),<br>(Schweizer<br>& Po 1996)                                                    |
|    |                       | ACCCTTCGAAATTGAAAAAG       | glpD<br>operon(re)              |                                                                                                            |
|    |                       | ACCCTTCGAAATTGAAAAAG       | glpD<br>operon(re)              |                                                                                                            |
| 25 | NarL<br><b>PA3879</b> | TGTTTCAT                   | hemA<br>operon(u)               | (Krieger et<br>al. 2002)                                                                                   |
|    |                       | TGTCTAT                    | hemA<br>operon(u)               |                                                                                                            |
|    |                       | TACCTCT                    | narK1<br>operon(u)              |                                                                                                            |
|    |                       | TACGGCT                    | narK1<br>operon(u)              |                                                                                                            |
|    |                       | TACCTCC                    | narK1<br>operon(u)              |                                                                                                            |
| 26 | TrpI<br><b>PA0037</b> | ATTCGTGAGTTTTCTGACAGGT     | trpBA<br>operon(a)              | (Chang & Cra<br>wford<br>1990), (Chan<br>& Crawford<br>1991)                                               |
|    |                       | TGCCGCAATCTTATCGGTTTCTT    | trpBA<br>operon(a)              |                                                                                                            |
| 27 | PhhR<br><b>PA0873</b> | CGTAAGGAAAACCTTACG         | phhABC<br>operon(a)             | (Song & Jens<br>en 1996)                                                                                   |
|    |                       | CGTCAAGAATATGTGACA         | phhABC<br>operon(a)             |                                                                                                            |
| 28 | AguR<br><b>PA0294</b> | TCCGATTTTATCGGA            | aguBA<br>operon(re)             | (Nakada et<br>al. 2001)                                                                                    |
| 29 | QscR<br><b>PA1898</b> | ACCTGCCCGGAAGGGCAGGTTGTCCC | PA1897<br>promoter<br>region(u) | (Lee et al.<br>2006)                                                                                       |
|    |                       | ACCTTGCCTTTCGGGCAGGTTGGCGG | PA5351<br>promoter<br>region(u) |                                                                                                            |

|    |                                                       |                                              |                                 |                                                                                                                                                                                                                                                                        |
|----|-------------------------------------------------------|----------------------------------------------|---------------------------------|------------------------------------------------------------------------------------------------------------------------------------------------------------------------------------------------------------------------------------------------------------------------|
| 30 | RpoS<br><b>PA3622</b>                                 | CTGTGCT                                      | lecA promoter region(a)         | <a href="#">(Winzer et al. 2000)</a> ,<br><a href="#">(Schuster et al. 2004)</a>                                                                                                                                                                                       |
|    |                                                       | CTTTGCT                                      | lecA promoter region(a)         |                                                                                                                                                                                                                                                                        |
|    |                                                       | CTTTACT                                      | cheY2 promoter region(u)        |                                                                                                                                                                                                                                                                        |
|    |                                                       | CTAGTTT                                      | mcpA promoter region(u)         |                                                                                                                                                                                                                                                                        |
| 31 | RpoH<br><b>PA0376</b>                                 | GCATGCCCTTGAAATGGCTTGTGGCGACCTTAT<br>GTA     | groESL promoter region(a)       | <a href="#">(Fujita et al. 1998)</a>                                                                                                                                                                                                                                   |
| 32 | PchR<br><b>PA4227</b>                                 | CTGCAGCGAATGAAAAAGCCCCGCAATCGAAA             | pchR-pchD intergenic region (u) | <a href="#">(Michel et al. 2005)</a>                                                                                                                                                                                                                                   |
| 33 | NfxB<br><b>PA4600</b>                                 | TTGATTGAAAACGGATCGAATGGTACTTTTTTCG<br>AGCTAA | nfxB gene upstream(re)          | <a href="#">(Shiba et al. 1995)</a>                                                                                                                                                                                                                                    |
|    |                                                       | TTGAGTCAATATTGTCTCAAATGATCTTTTGAC<br>AGCTAA  | nfxB gene upstream(re)          |                                                                                                                                                                                                                                                                        |
| 34 | IHF<br><b>PA3161</b><br><b>PA2738</b><br>(2 subunits) | CAAGGGATTTGTTCA                              | hemA operon(a)                  | <a href="#">(Arora et al. 1997)</a> ,<br><a href="#">(Wozniak&amp; Ohman 1994)</a> ,<br><a href="#">(Delic-Attree et al. 1997)</a> ,<br><a href="#">(Yamano et al. 1998)</a> ,<br><a href="#">(Krieger et al. 2002)</a> ,<br><a href="#">(Wozniak&amp; Ohman 1993)</a> |
|    |                                                       | CAATACATCGGCAAT                              | hemA operon(a)                  |                                                                                                                                                                                                                                                                        |
|    |                                                       | CAATGGTTGTCCTGC                              | hemA operon(a)                  |                                                                                                                                                                                                                                                                        |
|    |                                                       | GTTTCGCAACGCTTTGATTTTCAAATGAAAAAA<br>A       | FleSR operon(a)                 |                                                                                                                                                                                                                                                                        |
|    |                                                       | TTAAAGCTATTAAATATGAATAATTA                   | oprE operon(a)                  |                                                                                                                                                                                                                                                                        |
|    |                                                       | TAAAAACACTTTTAATCAATAAGTTA                   | algB operon(a)                  |                                                                                                                                                                                                                                                                        |
|    |                                                       | CAATAATTCAGCCGTACCTCTTT                      | narK1 operon(a)                 |                                                                                                                                                                                                                                                                        |
|    |                                                       | CAACCTGTTG                                   | IHF binding site(a)             |                                                                                                                                                                                                                                                                        |
|    |                                                       | ATATCAAACGGATA                               | algD-algA operon(a)             |                                                                                                                                                                                                                                                                        |
|    |                                                       | CCATCAAGTTGGTA                               | algD-algA operon(a)             |                                                                                                                                                                                                                                                                        |
| 35 | AlgR<br><b>PA5261</b>                                 | CTCAACCGTTCGTCTGCAAGT                        | algD-algA operon(a)             | <a href="#">(Kato&amp;Chakrabarty 1991)</a> ,<br><a href="#">(Mohr et al. 1991)</a>                                                                                                                                                                                    |
|    |                                                       | TGGCGCTACCGTTCGTCCCTCCG                      | algD-algA operon(a)             |                                                                                                                                                                                                                                                                        |
| 36 | MvaT<br><b>PA4315</b>                                 | CGATTATTCGGTTTTTCATGAACAAC                   | ptxs-ptx intergenic region (u)  | <a href="#">(Westfall et al. 2004)</a>                                                                                                                                                                                                                                 |
| 37 | SigX<br><b>PA1776</b>                                 | GAAGTTCTGATAAACTTGCCACCCAAGTTGTG             | oprF gene upstream region(a)    | <a href="#">(Brinkman et al. 1999)</a>                                                                                                                                                                                                                                 |
| 38 | PrtN<br><b>PA0610</b>                                 | ATTGCAGTTTG                                  | S1 pyocin gene                  |                                                                                                                                                                                                                                                                        |



|    |                       |                 |                                |                                      |
|----|-----------------------|-----------------|--------------------------------|--------------------------------------|
|    |                       |                 | upstream (a)                   |                                      |
|    |                       | ATTGCTGTGT      | R2 pyocin gene upstream(a)     | <a href="#">(Matsui et al. 1993)</a> |
|    |                       | ATTCCAGTGT      | R2 pyocin gene upstream(a)     |                                      |
|    |                       | ATTGGCGTTC      | R2 pyocin gene upstream(a)     |                                      |
|    |                       | ATTGCAGTGG      | R2 pyocin gene upstream(a)     |                                      |
|    |                       | ATTGTCGAGA      | R2 pyocin gene upstream(a)     |                                      |
| 39 | PycR<br><b>PA5437</b> | TCCGGTCGCTGCA   | pyca-pycr intergenic region(a) |                                      |
|    |                       | CTGCATGACCGGCAG | pyca-pycr intergenic region(a) |                                      |
|    |                       | TGACCGGCAGGCA   | pyca-pycr intergenic region(a) |                                      |

## References

- Albus AM, Pesci EC, Runyen-Janecky LJ, West SE and Iglewski BH (1997). Vfr controls quorum sensing in *Pseudomonas aeruginosa*. *J Bacteriol* **179**: 3928-3935.
- Arai H, Igarashi Y and Kodama T (1995). Expression of the nir and nor genes for denitrification of *Pseudomonas aeruginosa* requires a novel CRP/FNR-related transcriptional regulator, DNR, in addition to ANR. *FEBS Lett* **371**: 73-76.
- Arai H, Kodama T and Igarashi Y (1997). Cascade regulation of the two CRP/FNR-related transcriptional regulators (ANR and DNR) and the denitrification enzymes in *Pseudomonas aeruginosa*. *Mol Microbiol* **25**: 1141-1148.
- Arai H, Mizutani M and Igarashi Y (2003). Transcriptional regulation of the nos genes for nitrous oxide reductase in *Pseudomonas aeruginosa*. *Microbiology* **149**: 29-36.
- Arora SK, Ritchings BW, Almira EC, Lory S and Ramphal R (1997). A transcriptional activator, FleQ, regulates mucin adhesion and flagellar gene expression in *Pseudomonas aeruginosa* in a cascade manner. *J Bacteriol* **179**: 5574-5581.
- Baynham PJ, Brown AL, Hall LL and Wozniak DJ (1999). *Pseudomonas aeruginosa* AlgZ, a ribbon-helix-helix DNA-binding protein, is essential for alginate synthesis and algD transcriptional activation. *Mol Microbiol* **33**: 1069-1080.
- Baynham PJ and Wozniak DJ (1996). Identification and characterization of AlgZ, an AlgT-dependent DNA-binding protein required for *Pseudomonas aeruginosa* algD transcription. *Mol Microbiol* **22**: 97-108.

- Brinkman FS, Schoofs G, Hancock RE and De Mot R (1999). Influence of a putative ECF sigma factor on expression of the major outer membrane protein, OprF, in *Pseudomonas aeruginosa* and *Pseudomonas fluorescens*. *J Bacteriol* **181**: 4746-4754.
- Cao H, Krishnan G, Goumnerov B, Tsongalis J, Tompkins R and Rahme LG (2001). A quorum sensing-associated virulence gene of *Pseudomonas aeruginosa* encodes a LysR-like transcription regulator with a unique self-regulatory mechanism. *Proc Natl Acad Sci U S A* **98**: 14613-14618.
- Chang M and Crawford IP (1990). The roles of indoleglycerol phosphate and the TrpI protein in the expression of *trpBA* from *Pseudomonas aeruginosa*. *Nucleic Acids Res* **18**: 979-988.
- Chang M and Crawford IP (1991). In vitro determination of the effect of indoleglycerol phosphate on the interaction of purified TrpI protein with its DNA-binding sites. *J Bacteriol* **173**: 1590-1597.
- Dasgupta N, Ferrell EP, Kanack KJ, West SE and Ramphal R (2002). *fleQ*, the gene encoding the major flagellar regulator of *Pseudomonas aeruginosa*, is sigma70 dependent and is downregulated by Vfr, a homolog of *Escherichia coli* cyclic AMP receptor protein. *J Bacteriol* **184**: 5240-5250.
- de Kievit TR, Kakai Y, Register JK, Pesci EC and Iglewski BH (2002). Role of the *Pseudomonas aeruginosa* *las* and *rhl* quorum-sensing systems in *rhlII* regulation. *FEMS Microbiol Lett* **212**: 101-106.
- Delic-Attree I, Toussaint B, Garin J and Vignais PM (1997). Cloning, sequence and mutagenesis of the structural gene of *Pseudomonas aeruginosa* *CysB*, which can activate *algD* transcription. *Mol Microbiol* **24**: 1275-1284.
- Evans K, Adewoye L and Poole K (2001). MexR repressor of the *mexAB-oprM* multidrug efflux operon of *Pseudomonas aeruginosa*: identification of MexR binding sites in the *mexA-mexR* intergenic region. *J Bacteriol* **183**: 807-812.
- Firoved AM, Boucher JC and Deretic V (2002). Global genomic analysis of AlgU (sigma(E))-dependent promoters (sigmulon) in *Pseudomonas aeruginosa* and implications for inflammatory processes in cystic fibrosis. *J Bacteriol* **184**: 1057-1064.
- Fujita M, Amemura A and Aramaki H (1998). Transcription of the *groESL* operon in *Pseudomonas aeruginosa* PAO1. *FEMS Microbiol Lett* **163**: 237-242.
- Galimand M, Gamper M, Zimmermann A and Haas D (1991). Positive FNR-like control of anaerobic arginine degradation and nitrate respiration in *Pseudomonas aeruginosa*. *J Bacteriol* **173**: 1598-1606.
- Gamper M, Zimmermann A and Haas D (1991). Anaerobic regulation of transcription initiation in the *arcDABC* operon of *Pseudomonas aeruginosa*. *J Bacteriol* **173**: 4742-4750.
- Goranson J, Hovey AK and Frank DW (1997). Functional analysis of *exsC* and *exsB* in regulation of exoenzyme S production by *Pseudomonas aeruginosa*. *J Bacteriol* **179**: 1646-1654.
- Hassett DJ, Howell ML, Ochsner UA, Vasil ML, Johnson Z and Dean GE (1997). An operon containing *fumC* and *sodA* encoding fumarase C and manganese superoxide dismutase is controlled by the ferric uptake regulator in *Pseudomonas aeruginosa*: *fur* mutants produce elevated alginate levels. *J Bacteriol* **179**: 1452-1459.
- Hovey AK and Frank DW (1995). Analyses of the DNA-binding and transcriptional activation properties of ExsA, the transcriptional activator of the *Pseudomonas aeruginosa* exoenzyme S regulon. *J Bacteriol* **177**: 4427-4436.
- Hudson JM and Fried MG (1990). Co-operative interactions between the catabolite gene activator protein and the lac repressor at the lactose promoter. *J Mol Biol* **214**: 381-396.

- Hunt TA, Peng WT, Loubens I and Storey DG (2002). The *Pseudomonas aeruginosa* alternative sigma factor PvdS controls exotoxin A expression and is expressed in lung infections associated with cystic fibrosis. *Microbiology* **148**: 3183-3193.
- Jin S, Ishimoto KS and Lory S (1994). PilR, a transcriptional regulator of piliation in *Pseudomonas aeruginosa*, binds to a cis-acting sequence upstream of the pilin gene promoter. *Mol Microbiol* **14**: 1049-1057.
- Jyot J, Dasgupta N and Ramphal R (2002). FleQ, the major flagellar gene regulator in *Pseudomonas aeruginosa*, binds to enhancer sites located either upstream or atypically downstream of the RpoN binding site. *J Bacteriol* **184**: 5251-5260.
- Kato J and Chakrabarty AM (1991). Purification of the regulatory protein AlgR1 and its binding in the far upstream region of the algD promoter in *Pseudomonas aeruginosa*. *Proc Natl Acad Sci U S A* **88**: 1760-1764.
- Kohler T, Epp SF, Curty LK and Pechere JC (1999). Characterization of MexT, the regulator of the MexE-MexF-OprN multidrug efflux system of *Pseudomonas aeruginosa*. *J Bacteriol* **181**: 6300-6305.
- Kojic M, Jovcic B, Vindigni A, Odreman F and Venturi V (2005). Novel target genes of PsrA transcriptional regulator of *Pseudomonas aeruginosa*. *FEMS Microbiol Lett* **246**: 175-181.
- Krieger R, Rompf A, Schobert M and Jahn D (2002). The *Pseudomonas aeruginosa* hemA promoter is regulated by Anr, Dnr, NarL and Integration Host Factor. *Mol Genet Genomics* **267**: 409-417.
- Kukavica-Ibrulj I, Sanschagrin F, Peterson A, Whiteley M, Boyle B, Mackay J and Levesque RC (2008). Functional genomics of PycR, a LysR family transcriptional regulator essential for maintenance of *Pseudomonas aeruginosa* in the rat lung. *Microbiology* **154**: 2106-2118.
- Lee JH, Lequette Y and Greenberg EP (2006). Activity of purified QscR, a *Pseudomonas aeruginosa* orphan quorum-sensing transcription factor. *Mol Microbiol* **59**: 602-609.
- Lu CD and Abdelal AT (2001). The gdhB gene of *Pseudomonas aeruginosa* encodes an arginine-inducible NAD(+)-dependent glutamate dehydrogenase which is subject to allosteric regulation. *J Bacteriol* **183**: 490-499.
- Lu CD, Winteler H, Abdelal A and Haas D (1999). The ArgR regulatory protein, a helper to the anaerobic regulator ANR during transcriptional activation of the arcD promoter in *Pseudomonas aeruginosa*. *J Bacteriol* **181**: 2459-2464.
- Lu CD, Yang Z and Li W (2004). Transcriptome analysis of the ArgR regulon in *Pseudomonas aeruginosa*. *J Bacteriol* **186**: 3855-3861.
- Matsui H, Sano Y, Ishihara H and Shinomiya T (1993). Regulation of pyocin genes in *Pseudomonas aeruginosa* by positive (prtN) and negative (prtR) regulatory genes. *J Bacteriol* **175**: 1257-1263.
- Michel L, Gonzalez N, Jagdeep S, Nguyen-Ngoc T and Reimmann C (2005). PchR-box recognition by the AraC-type regulator PchR of *Pseudomonas aeruginosa* requires the siderophore pyochelin as an effector. *Mol Microbiol* **58**: 495-509.
- Miyazaki H, Kato H, Nakazawa T and Tsuda M (1995). A positive regulatory gene, pvdS, for expression of pyoverdinin biosynthetic genes in *Pseudomonas aeruginosa* PAO. *Mol Gen Genet* **248**: 17-24.
- Mohr CD, Hibler NS and Deretic V (1991). AlgR, a response regulator controlling mucoidy in *Pseudomonas aeruginosa*, binds to the FUS sites of the algD promoter located unusually far upstream from the mRNA start site. *J Bacteriol* **173**: 5136-5143.
- Nakada Y, Jiang Y, Nishijyo T, Itoh Y and Lu CD (2001). Molecular characterization and regulation of the aguBA operon, responsible for agmatine utilization in *Pseudomonas aeruginosa* PAO1. *J Bacteriol* **183**: 6517-6524.

- Nishijyo T, Park SM, Lu CD, Itoh Y and Abdelal AT (1998). Molecular characterization and regulation of an operon encoding a system for transport of arginine and ornithine and the ArgR regulatory protein in *Pseudomonas aeruginosa*. *J Bacteriol* **180**: 5559-5566.
- Ochs MM, Lu CD, Hancock RE and Abdelal AT (1999). Amino acid-mediated induction of the basic amino acid-specific outer membrane porin OprD from *Pseudomonas aeruginosa*. *J Bacteriol* **181**: 5426-5432.
- Ochsner UA, Johnson Z and Vasil ML (2000). Genetics and regulation of two distinct haem-uptake systems, *phu* and *has*, in *Pseudomonas aeruginosa*. *Microbiology* **146** ( Pt 1): 185-198.
- Ochsner UA, Vasil AI and Vasil ML (1995). Role of the ferric uptake regulator of *Pseudomonas aeruginosa* in the regulation of siderophores and exotoxin A expression: purification and activity on iron-regulated promoters. *J Bacteriol* **177**: 7194-7201.
- Ochsner UA and Vasil ML (1996). Gene repression by the ferric uptake regulator in *Pseudomonas aeruginosa*: cycle selection of iron-regulated genes. *Proc Natl Acad Sci U S A* **93**: 4409-4414.
- Ochsner UA, Wilderman PJ, Vasil AI and Vasil ML (2002). GeneChip expression analysis of the iron starvation response in *Pseudomonas aeruginosa*: identification of novel pyoverdine biosynthesis genes. *Mol Microbiol* **45**: 1277-1287.
- Park SM, Lu CD and Abdelal AT (1997). Purification and characterization of an arginine regulatory protein, ArgR, from *Pseudomonas aeruginosa* and its interactions with the control regions for the *car*, *argF*, and *aru* operons. *J Bacteriol* **179**: 5309-5317.
- Pesci EC, Pearson JP, Seed PC and Iglewski BH (1997). Regulation of *las* and *rhl* quorum sensing in *Pseudomonas aeruginosa*. *J Bacteriol* **179**: 3127-3132.
- Pessi G and Haas D (2000). Transcriptional control of the hydrogen cyanide biosynthetic genes *hcnABC* by the anaerobic regulator ANR and the quorum-sensing regulators LasR and RhIR in *Pseudomonas aeruginosa*. *J Bacteriol* **182**: 6940-6949.
- Rampioni G, Bertani I, Zennaro E, Polticelli F, Venturi V and Leoni L (2006). The quorum-sensing negative regulator RsaL of *Pseudomonas aeruginosa* binds to the *lasI* promoter. *J Bacteriol* **188**: 815-819.
- Ramsey DM, Baynham PJ and Wozniak DJ (2005). Binding of *Pseudomonas aeruginosa* AlgZ to sites upstream of the *algZ* promoter leads to repression of transcription. *J Bacteriol* **187**: 4430-4443.
- Rompf A, Hungerer C, Hoffmann T, Lindenmeyer M, Romling U, Gross U, Doss MO, Arai H, Igarashi Y and Jahn D (1998). Regulation of *Pseudomonas aeruginosa* *hemF* and *hemN* by the dual action of the redox response regulators Anr and Dnr. *Mol Microbiol* **29**: 985-997.
- Rust L, Pesci EC and Iglewski BH (1996). Analysis of the *Pseudomonas aeruginosa* elastase (*lasB*) regulatory region. *J Bacteriol* **178**: 1134-1140.
- Schuster M, Hawkins AC, Harwood CS and Greenberg EP (2004). The *Pseudomonas aeruginosa* RpoS regulon and its relationship to quorum sensing. *Mol Microbiol* **51**: 973-985.
- Schweizer HP, Jump R and Po C (1997). Structure and gene-polypeptide relationships of the region encoding glycerol diffusion facilitator (*glpF*) and glycerol kinase (*glpK*) of *Pseudomonas aeruginosa*. *Microbiology* **143** ( Pt 4): 1287-1297.
- Schweizer HP and Po C (1996). Regulation of glycerol metabolism in *Pseudomonas aeruginosa*: characterization of the *glpR* repressor gene. *J Bacteriol* **178**: 5215-5221.
- Shiba T, Ishiguro K, Takemoto N, Koibuchi H and Sugimoto K (1995). Purification and characterization of the *Pseudomonas aeruginosa* NfxB protein, the negative regulator of the *nfxB* gene. *J Bacteriol* **177**: 5872-5877.
- Song J and Jensen RA (1996). PhhR, a divergently transcribed activator of the phenylalanine hydroxylase gene cluster of *Pseudomonas aeruginosa*. *Mol Microbiol* **22**: 497-507.

- Suh SJ, Runyen-Janecky LJ, Maleniak TC, Hager P, MacGregor CH, Zielinski-Mozny NA, Phibbs PV, Jr. and West SE (2002). Effect of *vfr* mutation on global gene expression and catabolite repression control of *Pseudomonas aeruginosa*. *Microbiology* **148**: 1561-1569.
- Swanson BL, Colmer JA and Hamood AN (1999). The *Pseudomonas aeruginosa* exotoxin A regulatory gene, *ptxS*: evidence for negative autoregulation. *J Bacteriol* **181**: 4890-4895.
- Vijgenboom E, Busch JE and Canters GW (1997). In vivo studies disprove an obligatory role of azurin in denitrification in *Pseudomonas aeruginosa* and show that *azu* expression is under control of *rpoS* and ANR. *Microbiology* **143** ( Pt 9): 2853-2863.
- Westfall LW, Luna AM, San Francisco M, Diggle SP, Worrall KE, Williams P, Camara M and Hamood AN (2004). The *Pseudomonas aeruginosa* global regulator MvaT specifically binds to the *ptxS* upstream region and enhances *ptxS* expression. *Microbiology* **150**: 3797-3806.
- Whiteley M and Greenberg EP (2001). Promoter specificity elements in *Pseudomonas aeruginosa* quorum-sensing-controlled genes. *J Bacteriol* **183**: 5529-5534.
- Whiteley M, Lee KM and Greenberg EP (1999). Identification of genes controlled by quorum sensing in *Pseudomonas aeruginosa*. *Proc Natl Acad Sci U S A* **96**: 13904-13909.
- Wilson MJ, McMorran BJ and Lamont IL (2001). Analysis of promoters recognized by PvdS, an extracytoplasmic-function sigma factor protein from *Pseudomonas aeruginosa*. *J Bacteriol* **183**: 2151-2155.
- Winteler HV and Haas D (1996). The homologous regulators ANR of *Pseudomonas aeruginosa* and FNR of *Escherichia coli* have overlapping but distinct specificities for anaerobically inducible promoters. *Microbiology* **142** ( Pt 3): 685-693.
- Winzer K, Falconer C, Garber NC, Diggle SP, Camara M and Williams P (2000). The *Pseudomonas aeruginosa* lectins PA-IL and PA-IIL are controlled by quorum sensing and by RpoS. *J Bacteriol* **182**: 6401-6411.
- Wozniak DJ and Ohman DE (1993). Involvement of the alginate *algT* gene and integration host factor in the regulation of the *Pseudomonas aeruginosa* *algB* gene. *J Bacteriol* **175**: 4145-4153.
- Wozniak DJ and Ohman DE (1994). Transcriptional analysis of the *Pseudomonas aeruginosa* genes *algR*, *algB*, and *algD* reveals a hierarchy of alginate gene expression which is modulated by *algT*. *J Bacteriol* **176**: 6007-6014.
- Yahr TL, Goranson J and Frank DW (1996). Exoenzyme S of *Pseudomonas aeruginosa* is secreted by a type III pathway. *Mol Microbiol* **22**: 991-1003.
- Yahr TL, Hovey AK, Kulich SM and Frank DW (1995). Transcriptional analysis of the *Pseudomonas aeruginosa* exoenzyme S structural gene. *J Bacteriol* **177**: 1169-1178.
- Yamano Y, Nishikawa T and Komatsu Y (1998). Involvement of the RpoN protein in the transcription of the *oprE* gene in *Pseudomonas aeruginosa*. *FEMS Microbiol Lett* **162**: 31-37.
- Yang H, Matewish M, Loubens I, Storey DG, Lam JS and Jin S (2000). *migA*, a quorum-responsive gene of *Pseudomonas aeruginosa*, is highly expressed in the cystic fibrosis lung environment and modifies low-molecular-mass lipopolysaccharide. *Microbiology* **146** ( Pt 10): 2509-2519.
- Yuan ZC, Zaheer R and Finan TM (2005). Phosphate limitation induces catalase expression in *Sinorhizobium meliloti*, *Pseudomonas aeruginosa* and *Agrobacterium tumefaciens*. *Mol Microbiol* **58**: 877-894.
