# Supplementary material for: P021 再燃を繰り返すアレルギー性気管支肺アスペルギルス症(ABPA)にオマリズマブが有効であった1例(成人気管支喘息,ポスターセッション,第24回日本アレルギー学会春季臨床大会)
Source: Royal Society of Chemistry journal article supplement (doi:10.1039/c3ib40180d), 2012-04-10
Supplement: c3ib40180d_2.xlsx [file c3ib40180d_2.xlsx]

## Sheet: Sheet1
TFs	number of potential target genes	number of interactions matched with literature	number of reported target genes in our database	cumulatibve binomial distribution P-value
Anr	8	7	92	2.71494e-12
ArgR	10	4	39	4.95376e-07
LasR	17	8	375	6.06723e-06
RhlR	6	5	355	6.08732e-06
PvdS	11	2	49	0.00406739
GlpR	15	1	3	0.00807895
Fur	21	2	46	0.0129977
OxyR	8	1	132	0.175192
IHF	37	1	23	0.142453
RpoS	6	2	776	0.199918
MexT	11	1	143	0.249632
ExsA	21	0	18	#NUM!
MvaT	19	0	181	#NUM!
NfxB	17	0	4	#NUM!
CysB	14	0	17	#NUM!
AguR	11	0	2	#NUM!
RpoN	11	0	965	#NUM!
AlgR	9	0	76	#NUM!
RpoH	9	0	2	#NUM!
PhoB	8	0	1	#NUM!
PsrA	8	0	204	#NUM!
SigX	8	0	1	#NUM!
AlgU	7	0	57	#NUM!
QscR	7	0	456	#NUM!
FleQ	6	0	146	#NUM!
PilR	6	0	1	#NUM!
MexR	5	0	4	#NUM!
PrtN	5	0	2	#NUM!
RsaL	5	0	2	#NUM!
Vfr	5	0	5	#NUM!
PtxS	4	0	1	#NUM!
PycR	4	0	34	#NUM!
AlgZ	3	0	13	#NUM!
MvfR	3	0	133	#NUM!
NarL	1	0	9	#NUM!
