# Supplementary material for: P021 再燃を繰り返すアレルギー性気管支肺アスペルギルス症(ABPA)にオマリズマブが有効であった1例(成人気管支喘息,ポスターセッション,第24回日本アレルギー学会春季臨床大会)
Source: Royal Society of Chemistry journal article supplement (doi:10.1039/c3ib40180d), 2012-04-10
Supplement: c3ib40180d_3.xlsx [file c3ib40180d_3.xlsx]

## Sheet: Sheet1
Probe Set ID	HLOT0	HLOT5	HLOT10	HLOT15	HLOT20	HLOT25	HLOT30	HLOT35	HLOT40	HLOT50	HLOT60	HLOT70	HLOT80	HLOT90	LHOT0	LHOT5	LHOT10	LHOT15	LHOT20	LHOT25	LHOT30	LHOT35	LHOT40	LHOT50	LHOT60	LHOT70	LHOT80	LHOT90	Representative Public ID	Pearson correlation coefficient between the HLOT and LHOT transitions	P-value corresponding to the negative Pearson correlation coefficient
PA0167_at	203.7	120.6	121	85.3	96.5	68.7	95.2	100.2	118.4	138.3	126.4	174.5	161.4	167.4	163.3	214.9	235.8	208.6	243.5	236.5	259.5	252.8	204.4	216.4	194.5	194.6	211	205.6	PA0167	-0.751983	0.000672971
PA0230_pcaB_at	227.7	160.1	126.9	94	109	109	47	80.8	80.8	107.9	80.5	74.2	67.3	90.3	209.9	350.6	561.7	553	585.6	532.5	651.5	563.9	689	649.8	448	391.6	420.8	338	PA0230	-0.575826	0.013656
PA0291_oprE_at	301	478.3	514.8	591.3	268.8	191.2	293.8	270.7	264.3	210.3	290.9	274.6	307.8	604	1392.7	582.9	1127.6	1160.4	1324.8	1374.2	1588.3	1509.7	1897	1578.2	1204.7	1095.4	1444.4	1343	PA0291	-0.492022	0.0333537
PA0315_at	664.4	676	400.8	445.4	260.9	169.8	122.5	105.4	91.2	78.7	67.2	70.6	53.1	68.9	309.7	208.6	409.1	425.1	507.5	508.7	554.2	616.5	566.4	540.4	403.8	423	555.2	609.5	PA0315	-0.819528	0.000140649
PA0337_ptsP_at	233.1	339.1	209.3	236.1	241.8	139.4	153.8	195.4	201.9	239.3	265.4	283.1	276.1	199.5	250.4	207.5	328.1	284.5	255.7	298.9	237.8	296.5	324.3	276	282.5	268.9	286.5	339.7	PA0337	-0.469274	0.0443979
PA0363_coaD_at	203.7	116.1	141.4	128.9	111.5	62.8	169.5	87.8	128.3	141.3	129.3	204.8	194.3	207.5	164.6	295.5	342.2	302.7	310.1	309.5	272.9	283.9	236.2	250.9	273.2	270.2	290.8	266	PA0363	-0.470899	0.0404716
PA0399_at	231.9	181.3	186.1	228.3	137.9	156.6	128.3	151.7	118.8	139.8	162.9	167.5	145.2	200	239.2	163.9	202.8	231.5	274.3	284.6	298.4	322.9	292	293.1	232.3	211.4	273.3	236.7	PA0399	-0.602265	0.00923937
PA0400_at	181.4	259.1	230.7	258.4	155.2	141	170.7	171.2	173.3	155.8	194.3	186.6	202	253	253.3	149.4	219.6	268.3	277.7	280.1	254.9	273	272.1	285	208.3	216.8	268	263.8	PA0400	-0.529862	0.0244156
PA0502_at	78.9	118.4	101.4	115.2	94	172.5	139.5	178.5	184.5	175.4	135.4	89.2	98.2	106.8	114.1	102.6	90.7	111.7	102.4	93.7	81.4	88.4	79	71.6	94.9	115	98.7	86.7	PA0502	-0.731134	0.00103931
PA0547_at	479.2	284.7	300.7	159.3	147.9	115.8	190.3	167.4	180.8	210.1	296.3	310.7	262.9	275.7	472.1	390.3	687.6	676.1	682.9	588.4	627.4	660.8	694.8	516.6	399.7	423	545.9	519.9	PA0547	-0.604817	0.00923937
PA1027_at	170.8	178.8	220	275.5	253.9	307.4	155.8	225	219.1	262	184.2	131.9	185.6	200.1	157	155.8	106.3	113.5	132.5	97.5	105.9	94.1	83.3	138	182.9	164.8	131.2	150	PA1027	-0.505353	0.0301312
PA1035_at	60.8	29.5	25	16.3	22.7	59.2	27.2	64.8	48.2	75.5	65.2	57.6	56	65.6	44.5	98.6	75.2	70	82.3	73.7	88.4	64.3	61.6	77.4	71.5	78.6	64.3	64.7	PA1035	-0.466808	0.0443979
PA1245_at	305.4	400.9	318	316.3	328.6	163.4	126	151	201.2	255	351.5	291.7	318.2	357	379.4	259.1	460.3	567.4	591.8	624.7	668.5	595.4	622.2	632.5	539	547.3	548	515.2	PA1245	-0.698236	0.00226344
PA1249_aprA_at	400.9	737.1	725.9	944.6	641	447.4	229.2	325.2	199.8	147	188	218.8	237.7	242.7	608	263	430.3	580.6	681.4	603.3	551.4	789.9	724.7	756.7	641.5	653.5	772.7	716.2	PA1249	-0.6275	0.00698756
PA1250_aprI_at	342.9	434.4	282.6	360.8	298.9	137.9	91.6	91.3	96.8	151	225.9	275.6	336.5	353.9	403.9	260.3	415.7	485.1	510.3	521.5	511.1	484.1	428.1	511.3	382.9	385.8	403.7	418.9	PA1250	-0.615379	0.00805389
PA1287_at	105.8	57.8	47.6	67.3	55.4	52.9	44.6	64.6	64.2	76.8	68.2	86.6	72.3	83.2	71.9	95.9	102.5	103.9	110.4	117.7	116.5	110.9	90.8	119.4	122.1	84.5	89.6	87.1	PA1287	-0.66595	0.00378135
PA1357_at	73.9	64.2	53.6	51.9	30.1	32.7	46.3	32.6	51.1	52.1	47.3	50.3	52.2	64.3	48.2	88.7	89.5	86	102	90.9	93.7	78.9	84	80	76.1	96.3	92.1	80.4	PA1357	-0.582493	0.0120527
PA1493_cysP_at	661.2	541.3	472.4	528.6	351.7	267.1	369.8	281.7	312.8	325.1	359	244.6	327.6	640	790.3	352.9	794.8	1008.3	1135	1167.6	1365.9	1443.2	1783.5	1196.8	1030	894.2	1113.3	1088.9	PA1493	-0.521678	0.0244156
PA1494_at	189	154	223.9	184.5	174	313.1	300.5	274.5	243.5	239.1	151	195.9	169.9	198.3	166.2	195.2	137.7	127	149	142	122.6	169.5	155.3	162	210.2	215.8	172.7	173.1	PA1494	-0.546474	0.0195506
PA1504_at	242.7	182.4	154.4	148	119.8	101.2	280.3	114.5	168.2	167.2	161.6	236.7	262.7	283.8	202.1	253.7	324.9	301.9	354.4	305.1	283.5	317.9	258.2	249.9	234.3	238.9	261.6	298.6	PA1504	-0.460449	0.0443979
PA1522_at	163.3	124.7	147.1	110.8	142.3	214.4	226.1	361.4	274.2	227.2	143.4	122.9	101.8	116.9	118.1	143.5	80.5	112.4	91.5	97.8	87.1	91.1	103.6	92.2	140.1	139.1	119.1	105	PA1522	-0.497485	0.0333537
PA1550_at	76.2	62.3	106	120.1	160.2	573.8	759.1	1389.7	909.3	680.2	903.5	657.1	683.5	616	150.3	108.9	101.5	96.3	79	71	73.1	69	118.5	62.9	70.9	67	81.7	104.1	PA1550	-0.509811	0.0301312
PA1561_aer_at	147.2	291.1	246.4	340.7	525	1588.8	630.7	1112	695.9	575.2	1134.5	1055.4	964.8	613.2	255.7	179	151.8	152.7	156.1	155.4	155	137.2	193.7	110.7	103.2	122	114.2	92.9	PA1561	-0.458524	0.0486057
PA1746_at	38.6	132.2	296.4	304.1	836.7	1963.6	1058.8	2462.6	1557.6	1433.9	1976.3	1261.1	966.2	681.8	255.5	132.4	80.2	70	48.2	38.9	37.8	27	96.7	33.1	88.4	70.1	37.9	39.8	PA1746	-0.528222	0.0244156
PA1750_at	547.8	356.8	356.7	324	174.9	122	245.2	179	120.5	114.5	237.7	311.6	313.2	298.2	406.5	383.1	576.9	514.3	606.5	576.5	573.4	565.8	516.3	542.6	401.9	408.2	426.1	477	PA1750	-0.580931	0.0120527
PA1864_at	12.8	17.9	22.7	13.9	19.7	14.6	11.4	21.5	46.8	58.8	18.7	28.6	23.4	36.1	270.4	187.6	246.5	224.1	287.9	283.1	234	204.9	207.3	146.8	189	194.4	263.4	232.3	PA1864	-0.573415	0.013656
PA1963_at	97	54.2	43.6	51.6	64.2	27.5	29.1	34.6	19.1	41.6	41.8	58.6	47.6	42.9	61.6	66.2	89.6	108.6	114.7	112.3	131.5	112	122.6	100.1	74.7	89.4	83.5	75.3	PA1963	-0.616675	0.00805389
PA1986_pqqB_at	162.4	135.2	150.4	92.5	66.3	94.8	126.7	160.9	171.7	170.2	217.9	203	190.6	174.6	169.1	215.8	241.5	228.7	254.6	213.5	196.7	196.6	200.2	192.5	182.5	160.2	153.5	142.6	PA1986	-0.756589	0.000672971
PA1988_pqqD_at	113.6	151.2	144.1	104.4	95.7	72.8	120.3	128.4	146.9	147.8	163.5	189.5	177.4	177.1	134.3	226.6	231.5	216.3	221.4	188	193.5	183.6	187.6	145.3	157.3	137.8	123.4	113.9	PA1988	-0.538556	0.021883
PA1996_ppiC1_at	137	71.3	77.1	56.7	64	57.4	114.7	64.7	90.1	98.3	92.2	111.8	123.6	99.1	107.9	149.7	125.1	123.1	126	137.6	124.3	116.1	99.6	138.7	113	104.9	115.6	124.9	PA1996	-0.457113	0.0486057
PA1999_at	42.8	26.9	48.4	19.4	24	24.6	19.9	43.8	92.4	85.5	34.9	76.5	53	83.3	37.9	181.8	156.7	139.1	202.7	168.4	176.3	144.4	122.1	150.3	142.3	123.9	80.2	75.9	PA1999	-0.453782	0.0486057
PA2030_at	353.2	342.5	257.6	238.3	176.6	187.6	233.8	170.8	130.8	127.8	173.9	204.5	230.9	259.7	466	284.8	484.9	494.9	503.7	514.2	551.7	560.5	496.4	462.2	415.2	385.8	440.7	412.6	PA2030	-0.450575	0.0486057
PA2204_at	529.4	537.9	444.4	519	290.3	196.9	187	156	225.1	240.8	225.4	214.1	288.2	999.8	1066	242.4	843.2	1185.7	1577.2	1714.3	1913.9	1772.4	2154.2	1865.6	1483.4	1259.1	1576.7	1458.8	PA2204	-0.473137	0.0404716
PA2250_lpdV_at	116.1	124	82.9	91.3	79.6	255.7	508.3	409.1	225.4	116	45.6	44.3	50.5	50.9	65	67.3	40.8	40.6	38.7	38.1	31.5	37.7	38.7	46.3	69.9	67.9	51.9	44.2	PA2250	-0.568746	0.0154574
PA2299_at	45.2	43	41.8	35.8	36.5	16.6	28.9	22.9	60.3	88.2	36.4	42.5	45.4	102.2	118.3	111.4	100.6	119.7	119.4	129.8	106.6	106.8	96.9	108	106.6	103.4	90.7	76.6	PA2299	-0.657752	0.00443684
PA2380_at	140.9	85.3	80	57.5	62.2	60.8	93.8	83.3	117.5	144.2	152.1	144.6	200.7	185.2	145.5	161.5	200.3	215.5	207	213.4	208	229.4	188.7	147.7	142.2	163	181	171	PA2380	-0.668461	0.00378135
PA2400_at	53.2	183.5	175.9	172.2	208	228.3	190.9	176.7	123.2	83.6	40	38.1	30.4	35.7	18	57.6	8.4	11.6	6.8	11.9	10.5	14	19.3	27.2	53.8	50.3	31.7	27.1	PA2400	-0.535864	0.021883
PA2402_at	128.8	233.1	219.3	239.1	222.1	209.2	131.1	84.5	77.8	93.6	34	69.8	45.7	54.7	25	92.6	18.9	12.2	16.9	19.1	20.2	27	39.6	45.5	99.5	81.8	64.6	76.5	PA2402	-0.516454	0.0271706
PA2423_at	215.6	143.9	87.4	82.6	44.4	44.8	19.1	65.5	56.2	97.4	88.8	158.2	141.9	160.1	194.3	204.7	219.4	212.4	227.6	201	222.1	259.9	180.1	167.5	171.1	165.3	194.3	174	PA2423	-0.451039	0.0486057
PA2560_at	133.6	86.2	61.9	58	40.4	45.2	76.9	40.9	41	40	55.3	49	52.2	59.4	133.3	96.8	132.4	159.6	158.7	196.4	191.4	168.8	186.5	185.9	133.5	125.4	160.5	145.9	PA2560	-0.452262	0.0486057
PA2588_at	111.8	120	105.1	97.3	85.8	51.1	29.9	49.7	66.1	95.8	100.9	121.1	127	130.4	198.7	194.7	194.8	191.3	190.2	190.7	214.8	187.3	162.5	170.9	142.3	141.3	140.3	146.3	PA2588	-0.545729	0.0195506
PA2591_at	201.5	136	106.5	63.5	114.9	159.3	87.5	186.3	169.1	172.3	209	165.2	139.2	160	161.2	142.5	216.2	206.4	189.8	214.5	269.5	196.8	183	185.9	199.6	192.4	195.5	183.3	PA2591	-0.467092	0.0443979
PA2616_trxB1_at	480	496.5	373.8	412.3	278.5	352.7	338.5	490.3	281.4	287.8	413	490.5	473.8	425.1	436.8	312.8	510.3	518.7	570.6	586	526.1	485	481.1	482.2	501.3	449.1	454.1	511.8	PA2616	-0.606532	0.00923937
PA2643_nuoH_at	530.6	784.7	642.1	756.4	666.3	697.1	514.1	766.5	577.9	679.3	1079	876.5	963.2	818.5	686.8	331.6	573.1	591	554.8	525	504.9	518.1	582.3	511.5	452.5	437	539.7	559	PA2643	-0.480682	0.0367872
PA2728_at	126.3	131.4	130.8	106.5	187.7	69.8	37.9	45	72.5	105.8	29.2	77.9	86.8	114.7	137.7	141.7	124	115.2	91	121.3	125	128.8	151	121.4	181.2	181.6	139.4	118.1	PA2728	-0.567624	0.0154574
PA2747_at	56	37.3	41.7	32.3	37.5	40.4	34.7	38.9	48.9	53.4	38.2	68.1	63.3	74.5	59.1	91.6	59.2	89	82.1	75.2	83.7	67.1	61.1	60.3	72.6	80.8	59.1	58.4	PA2747	-0.561182	0.0154574
PA2796_tal_at	336.6	287.6	249.9	293.8	183.1	123.7	133.7	169.8	133	143.2	222.5	289.2	272.6	245.4	287.8	232.5	374.7	341.2	372.8	464.4	366.5	471.6	381.5	351.4	281.8	263.8	332.7	354.1	PA2796	-0.697235	0.00226344
PA2830_htpX_at	124.3	165.5	187	220.4	472	829.8	729.6	790.4	533	324.1	289.7	172.1	109.6	188.2	184.2	119.7	98.3	143.6	125	124.5	128.1	105.6	126.6	146.6	131.4	147.5	157.3	141.4	PA2830	-0.4871	0.0367872
PA2840_at	126.5	105.6	583	484.2	491.7	520.3	1491.5	621.5	946.7	358.1	466.1	332.6	451.7	487.4	107.3	151.2	128.7	128.1	128.5	117.9	106.5	102.9	100.7	140.5	148.8	130.1	116.6	104.4	PA2840	-0.49462	0.0333537
PA3029_moaB2_at	421.1	358.9	295.8	361.1	202	158.7	216.6	173.3	194	235.9	304.5	396	352.1	374	399.4	334.3	496.9	497.3	461.7	524.1	505.2	497.7	459.1	494.4	469.4	418.1	461.1	492.1	PA3029	-0.559389	0.017417
PA3104_xcpP_at	404	214.4	215.6	162.8	176.9	164.3	154.1	162.7	138.1	143.2	229.6	246.5	261.9	262.4	306	265.1	404.3	371.5	428.7	389.3	416.7	457.2	415.1	359.2	294.8	279.5	348	384	PA3104	-0.546541	0.0195506
PA3145_wbpL_at	122.9	109.1	96.7	78.7	108.1	118.3	120	112.2	116.5	117.6	127.3	115	131.6	155.2	122.7	147.4	185	182.2	140.7	166.6	171.2	184	149.8	135.9	136.4	121.1	129.5	140.9	PA3145	-0.552201	0.017417
PA3146_wbpK_at	186.1	222.7	199.1	165.5	214.5	129.6	195.2	141	125.8	130.1	178.3	194.5	234.9	203	268.9	247.9	315.4	305.6	273.8	330.6	329.6	320.1	334.7	239.7	221.3	217.6	229.3	280.4	PA3146	-0.453717	0.0486057
PA3147_wbpJ_at	239.5	274	220.2	218.8	176.1	165.4	233.4	158.8	146.8	123.9	209.3	271.4	300.9	272.2	304.9	284.6	370.2	328.5	409.7	385.3	352.8	432.2	341.7	312.3	257.5	265.6	302.9	315.2	PA3147	-0.538348	0.021883
PA3149_wbpH_at	77.4	112.2	82.8	69.6	102.7	95.5	116.2	77.4	78.4	115.5	186.4	119.2	152.3	141.9	151.3	128.4	186.3	131.8	165.3	191.5	166.3	201.7	169.5	126.2	99.7	100.2	128.9	133.9	PA3149	-0.64655	0.00518595
PA3150_wbpG_at	111.1	163.7	88.9	73.2	96.4	108.1	103.7	90	87.1	79	143.3	136.5	153.2	142.4	132.7	112.7	149.1	146.7	194.4	191.4	164.9	207.4	157.5	148.4	107.1	100	124.9	144.2	PA3150	-0.626232	0.00698756
PA3221_csaA_at	61.4	26	39.2	19.7	11.9	19.4	32.8	13.5	56.1	57.2	25.9	61.8	50	77.3	52.9	96.3	74.1	82.8	71.2	84.8	74.1	64	53.3	72.5	81.7	70.9	59.8	72.4	PA3221	-0.47548	0.0404716
PA3224_at	166.3	132.2	118.5	125.4	122.1	102	77.5	119.9	122.3	139.6	134.6	154.1	167.2	151.7	149.9	207.1	225.6	222.4	207.5	214.4	226	220.9	179.3	181.9	162.3	202.1	195.2	205	PA3224	-0.589129	0.0120527
PA3295_at	127.7	74.8	70.4	53.8	67.6	65.2	91.2	67.9	70.9	66.2	77	115	107.7	109.8	120.2	146.1	189.6	180.2	188.7	188	191.7	196.9	168.3	159.8	134.7	145.3	178.4	170	PA3295	-0.507413	0.0301312
PA3326_at	2039.4	1761.9	1198	1360.9	1043.9	886.6	553.5	759	538.6	530.2	1059.2	958.8	1109.4	1215.1	1709	955.1	1902.4	1627.4	1840.8	1747.5	1810.1	1751.6	1746.6	2032.1	1396.7	1437	1852.2	1917	PA3326	-0.457906	0.0486057
PA3369_at	85.9	71	58.8	54.3	78.7	74.1	42.7	67.7	94.2	126.6	87.9	93.5	86.7	115.2	108.9	142.2	106.6	132	130.5	125.9	123.1	104.5	100.7	89.6	101.9	125.2	103.1	100.1	PA3369	-0.596533	0.010573
PA3476_rhlL_at	895.5	586.3	378.3	375	365.6	262.6	283.9	286.1	247.7	280	540.9	475.5	566	545.2	614.9	464.8	902.8	811.3	758.2	790.1	794.6	798.3	884.8	883.3	699.9	738.3	912.4	899.6	PA3476	-0.519389	0.0271706
PA3478_rhlB_at	971.4	1213.5	866.2	1056.1	917.4	443	288.2	564.1	530.3	690.9	1396.3	1144.5	1293.2	1090.2	1608.3	827.8	1562.4	1503.4	1490.2	1478.6	1488.1	1392.1	1511	1568.3	1241.4	1102.4	1404.3	1355.7	PA3478	-0.505929	0.0301312
PA3530_at	341.3	311	151.3	190.9	198.1	80.4	23.1	27.4	56.9	68.7	19.1	51.1	26.9	41.3	58.3	199.5	247.1	305.9	292.4	294	326.3	384.2	339.3	297.2	269	295.2	312.9	400	PA3530	-0.8008	0.000186904
PA3581_glpF_at	126.7	77.8	101.8	100.7	147.5	392.6	325.7	191.2	157.5	125	53	65.3	56	79.4	62.1	114.8	48.4	50.8	48.9	41.5	42.6	55.9	57.6	51.6	87.1	94.2	65.6	77.6	PA3581	-0.611826	0.00805389
PA3698_at	105.3	67.8	41	52.6	48.7	46.2	69.7	77.3	84	129.6	153.7	105.4	125.1	90.1	87	88.4	120	115.2	123.3	127.6	132.6	130.7	118	112.5	93.1	99.5	110.3	102.2	PA3698	-0.53496	0.021883
PA3898_at	121.4	84.9	90.4	53.1	61.2	57.1	84.5	72.7	119.1	139.3	81.9	122.2	155.8	161.9	255.3	265.3	333.7	322.6	314.5	291.5	323.3	336	326	220.7	217.6	276.6	255.3	244.6	PA3898	-0.548996	0.0195506
PA3930_cioA_at	272.6	251.1	183.8	166.9	137.9	131.1	128.6	137.1	163.8	131.4	71.1	101.6	100.7	171.9	173.7	196.4	234.4	263.2	261.8	265.9	262.7	285.5	283.5	275.1	280.4	244.7	249.9	223.5	PA3930	-0.79601	0.000245762
PA3958_at	71.2	54.6	68.3	40.2	67.6	47.7	66.9	50	84.6	74.6	75.1	87.4	75.7	68.1	64.5	113	103.6	113.1	114.1	97	89.6	86.1	73.6	78.4	88.2	70.1	89.1	82.7	PA3958	-0.640987	0.00518595
PA4068_at	90.1	71.8	74.5	83.6	61.7	41.4	55.8	36.5	62.2	75.6	65.2	68.8	72	78.6	59.5	82.1	94.1	77.1	89.8	88.8	98.3	96.1	82.6	93.8	100.7	81.5	90.9	92.2	PA4068	-0.538499	0.021883
PA4090_at	365.8	193.1	118	92.3	110.6	84.9	82.3	66.4	124.2	166.2	97.1	116	108.7	131.2	260.6	343.4	513.2	518.5	560.5	568.2	689	655.8	589.3	516.9	381.3	415.2	439.5	490.3	PA4090	-0.723847	0.0012752
PA4130_at	715.1	746	688.4	796.2	666.5	433.1	546.9	450.7	368.8	348.1	483.8	431.9	587	608.7	1150	557.8	1134.8	1004.8	1162.7	1205	1228.7	1215.7	1340.9	1262.3	1002.8	962.8	1306	1253.8	PA4130	-0.46208	0.0443979
PA4372_at	236.6	131.9	134.2	132.3	109.5	137.5	95.4	98.4	100.4	91.9	91.9	87.7	93.1	95.5	119.4	147.5	145.9	145.7	128.8	135.6	134.8	124.1	192	222.2	142	254.4	249.2	209.5	PA4372	-0.504188	0.0301312
PA4515_at	184.2	159.7	128.3	105.2	70.3	41.9	33.5	30.1	83.3	97.6	45.4	78.1	55.2	71.6	102.1	260	224.9	222.4	208.1	248.5	228.1	240.6	245.8	213.7	200.7	210.6	234.5	276.4	PA4515	-0.467661	0.0443979
PA4655_hemH_at	216.9	246.9	249.2	299.2	347.5	478.2	405.9	392	409.5	307.8	238.9	238.5	253.4	283.2	265.7	267.1	227.3	206.2	198.8	206.6	194.8	200	176.9	209.6	241.8	273.8	248.8	251.3	PA4655	-0.811652	0.000140649
PA5028_at	497.3	324.4	268.6	250.4	310.6	227	263.3	294	254.5	298.8	350.3	395.7	358.2	329.9	473	416.2	673.3	614.4	527.9	596.7	618.9	634.2	635.6	582.2	520.2	539.7	643.1	610.1	PA5028	-0.564899	0.0154574
PA5148_at	683.1	678.2	562.3	542.7	606.7	362.3	445.2	341	340.1	374.7	601.2	636.1	588.2	713	617.6	524.8	732.8	729.1	648.4	799.7	809.8	637.2	665.6	857.4	666	559.1	687.3	691.4	PA5148	-0.563536	0.0154574
PA5170_arcD_at	737.2	1747.8	1776.9	2212.2	1998.9	5212.5	1977.8	5321.2	2661.5	2648.6	4864.5	2452.6	1967.9	711.2	879.3	396.6	428.5	337	303.7	296.8	223	306.2	480.8	280.9	287.4	315.6	368.6	420.1	PA5170	-0.486108	0.0367872
PA5171_arcA_at	1383.5	2380	2541.4	3443.8	2492.3	4512.9	2175.4	5037.2	2701.7	2842.9	5244.9	2473.8	2467.8	1427.7	1725.3	638.1	1026.4	791	721.5	598.7	470.2	612.6	619.5	599.7	442.4	523.4	781.7	752.2	PA5171	-0.479713	0.0404716
PA5172_arcB_at	1357.8	2195.7	2691.8	3386.9	2434.2	4454.6	2494.9	5524.4	3206.9	3276.3	6276.4	3160.3	2933.3	1644.5	1671.9	654.6	983.3	849.8	760.9	638.5	511.5	664.6	659.9	687.7	534.3	524.1	736.5	787.4	PA5172	-0.496248	0.0333537
PA5173_arcC_at	402.5	629.7	836	929	496.2	1331.1	1728	3274.6	2211.7	2201.5	3845.7	1900	1833.7	809.4	570.7	234.6	246.6	223.2	198.4	138.5	134.4	122.3	135.9	183.4	167.7	154.2	164.7	186.1	PA5173	-0.514386	0.0271706
PA5243_hemB_at	128.2	189.6	175.4	231.6	163.2	228.8	397.2	363.1	300.8	356.5	474.1	396.7	456.2	444.4	201.9	140.2	174.1	194.4	161.8	171	163.2	166.3	161.9	148.4	131.1	145.2	172.8	168.7	PA5243	-0.45683	0.0486057
PA5255_algQ_at	811.7	624.1	423.5	368.2	426.6	449.3	336.8	583.7	517	600.2	893.7	610.6	651.5	630	815.6	471.3	868	836	840.1	867.6	966.1	867	860.1	854.5	672.7	685.9	800.8	793.7	PA5255	-0.52144	0.0244156
PA5313_at	124.7	111.2	102.9	91.8	110.6	146.6	91.8	77.6	112.8	106.9	59.8	87.4	71.8	97.3	98	129.5	103.3	99.7	106.2	117.8	102.5	116	115.1	125.1	166.5	184.2	157.1	147.8	PA5313	-0.520637	0.0244156
PA5531_tonB_at	282	228.9	188	208.6	172.6	83	45.3	62.6	109.1	141.1	43.3	90.4	69.2	89.3	218.6	228.1	251	285	252.8	285.7	348.4	300.1	299.6	310.6	282.8	280.5	326.8	389.9	PA5531	-0.713017	0.0015576
