# Supplementary figures and images for: Essential O2-responsive genes of Pseudomonas aeruginosa and their network revealed by integrating dynamic data from inverted conditions
Source: Royal Society of Chemistry journal article supplement (doi:10.1039/c3ib40180d), 2013-11-26

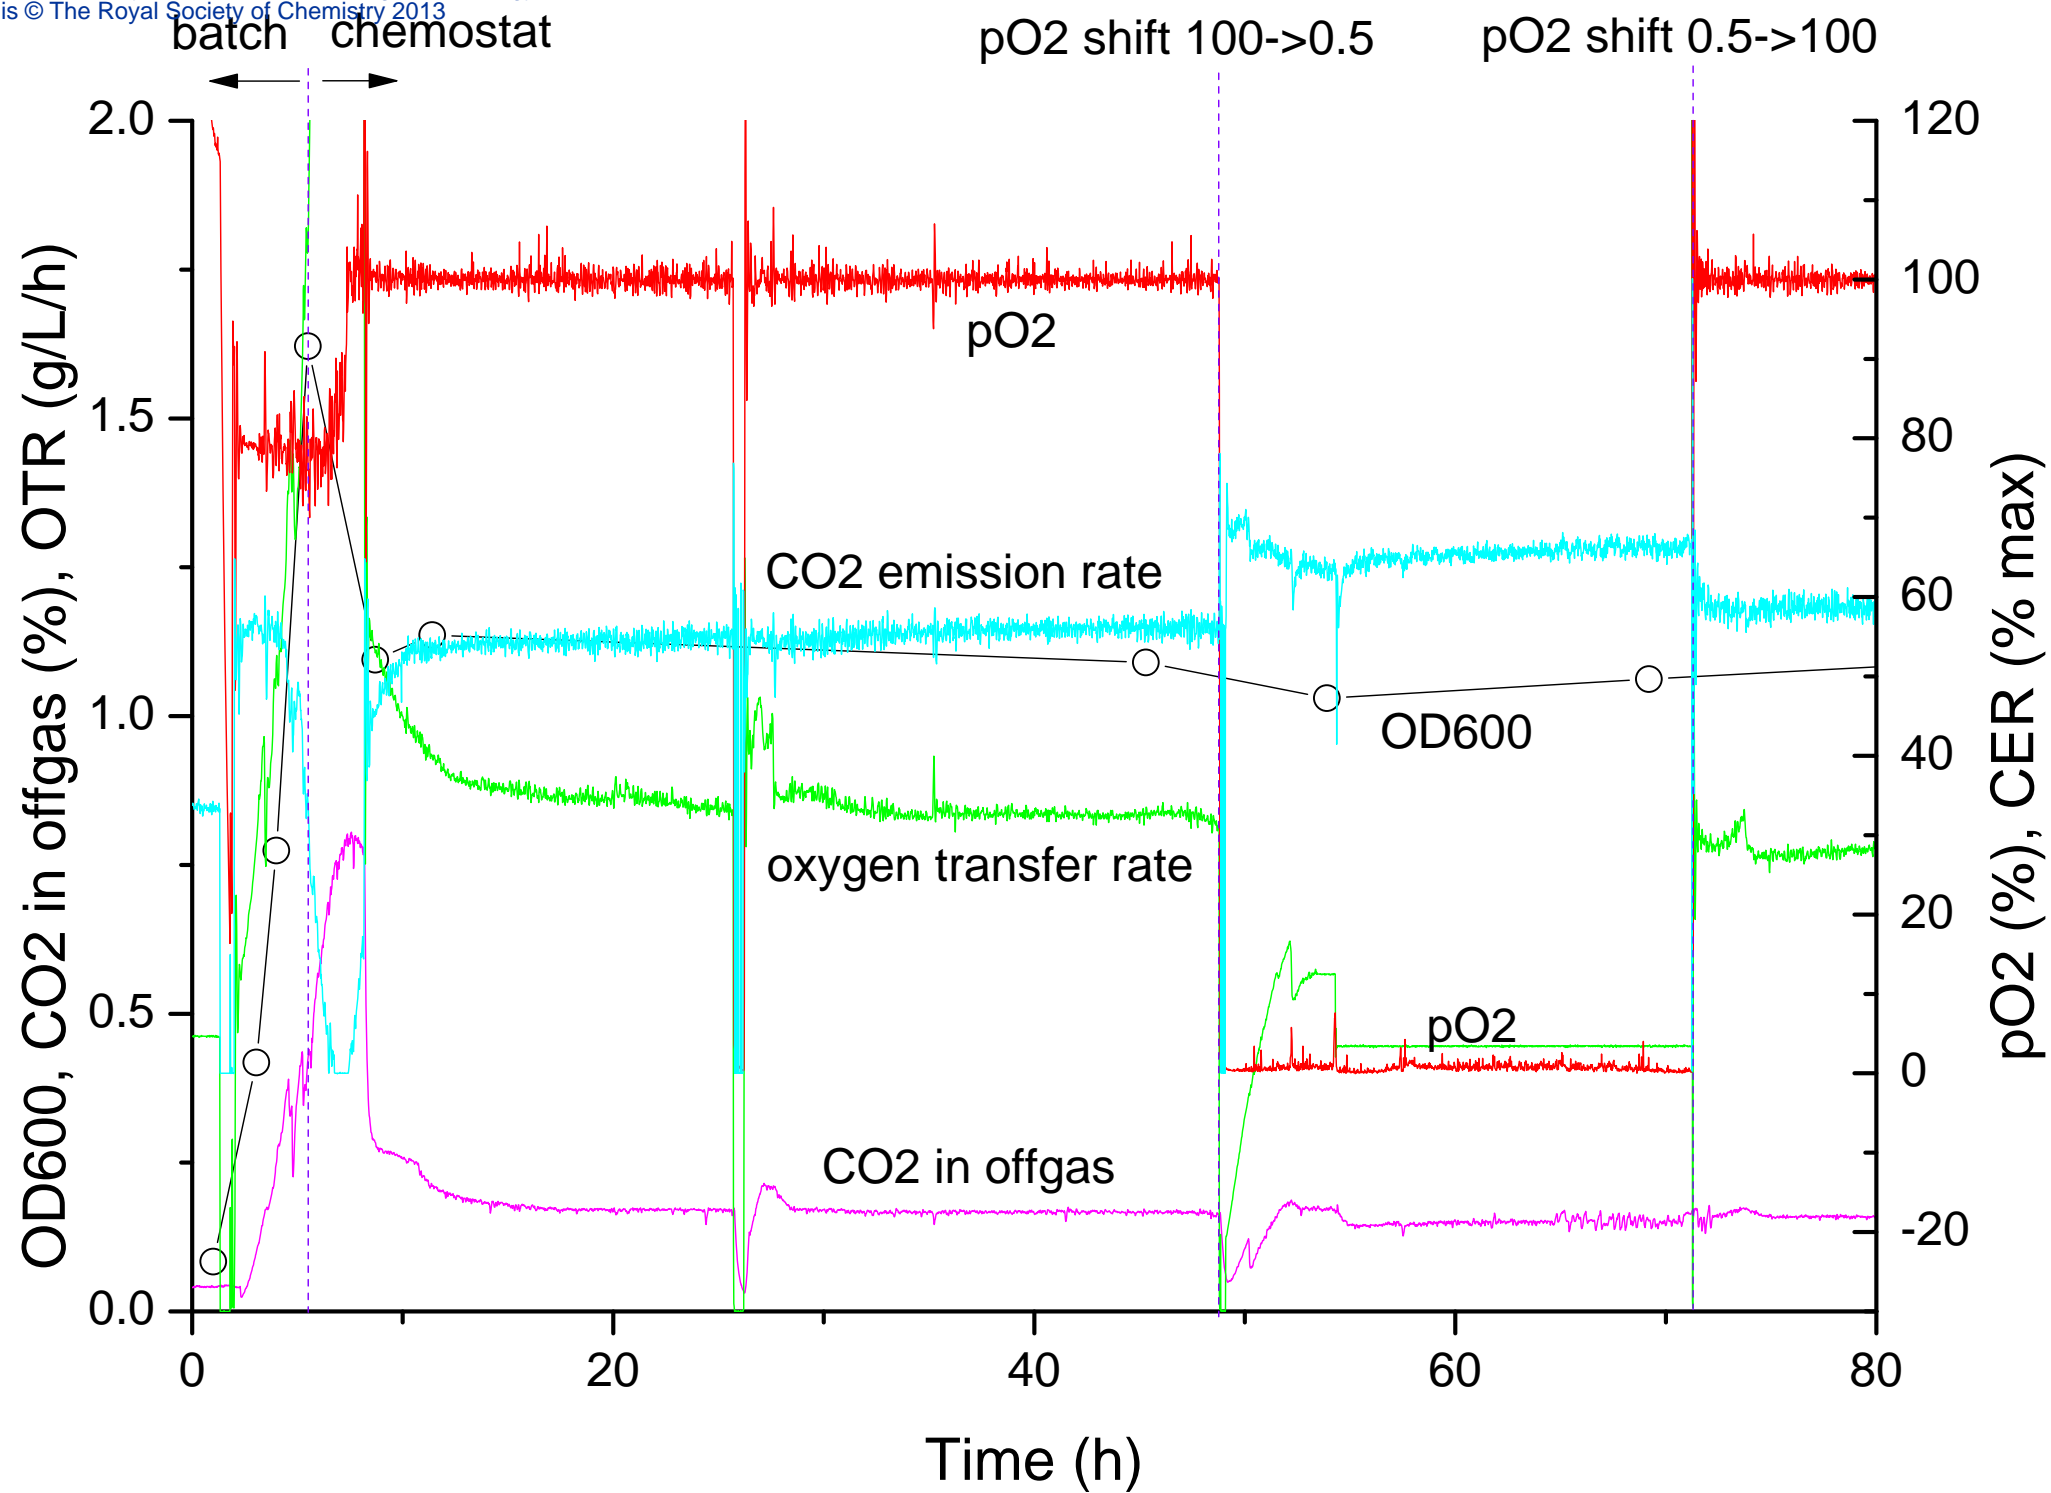

Supplement: c3ib40180d.pdf [file c3ib40180d.pdf]
